# Supplementary material for: Enforcement of Fairness Norms by Punishment: A Comparison of Gains and Losses
Source: Behav Sci (Basel). 2024 Jan 5;14(1):39. doi: 10.3390/bs14010039 (PMC10812817; doi:10.3390/bs14010039)
Supplement: Supplementary file 1 [file behavsci-14-00039-s001.zip › Supplementary Material Datasheet S1. Data-3PG-Losses.xls]

## Sheet: Sheet1
Session	Location	Subject	DGtype	Dictatorshare	Receivershare	DGpayoff	DGgroup	losstreatment	age	id	Year	dictator	female	nation	germany	studies	income	experience	Online	DGnochoice	Punishment	punish	ShowUpFee	Lever	fairbelief1	fairbelief2	fairbelief3	fairbelief4	fairbelief5	fairbelief6	fairbelief7	fairbelief8	fairbelief9	fairbelief10	fairbelief11	fairbelief2nd1	fairbelief2nd2	fairbelief2nd3	fairbelief2nd4	fairbelief2nd5	fairbelief2nd6	fairbelief2nd7	fairbelief2nd8	fairbelief2nd9	fairbelief2nd10	fairbelief2nd11	TPPDG	NoPunishDec	Tp
210804_1507	Magdeburg	3	Receiver		-10	-10	4	Loss	23	2021327	2021		männlich	Deutschland	1	Ja	ueber dem Durchschnitt	Ja	Online	0																											0		w/o punish
210701_1641	Leipzig	1	Dictator	10		10	7	Gain	28	2021221	2021	100	männlich	Deutschland	1	Nein	unter dem Durchschnitt	Ja	Online																												0		w/o punish
180509_0945	Leipzig	12	Receiver		-6	-6	2	Loss	21	1023	2018		männlich	Deutschland	1	Ja	ueber dem Durchschnitt	Ja	Labor																												0		w/o punish
210701_1641	Leipzig	12	Receiver		1	1	6	Gain	36	2021232	2021		weiblich	Deutschland	1	Nein	unter dem Durchschnitt	Ja	Online																												0		w/o punish
180321_1348	Leipzig	3	Dictator	5		5	5	Gain	30	1012	2018	50	weiblich	Deutschland	1	Ja	ueber dem Durchschnitt	Ja	Labor																												0		w/o punish
210701_1641	Leipzig	6	Dictator	10		10	4	Gain	31	2021226	2021	100	weiblich	Deutschland	1	Nein	unter dem Durchschnitt	Ja	Online																												0		w/o punish
210804_1507	Magdeburg	10	Dictator	-2		-2	1	Loss	28	2021330	2021	80	männlich	Deutschland	1	Ja	ueber dem Durchschnitt	Ja	Online	0																											0		w/o punish
180529_1024	Magdeburg	4	Dictator	-4.5		-4.5	7	Loss	22	2004	2018	55	weiblich	Deutschland	1	Ja	ueber dem Durchschnitt	Ja	Labor																												0		w/o punish
210803_1006	Magdeburg	11	Dictator	5		5	9	Gain	20	2021261	2021	50	weiblich	Deutschland	1	Ja	ueber dem Durchschnitt	Ja	Online	0																											0		w/o punish
180509_0945	Leipzig	1	Dictator	-5		-5	7	Loss	34	1068	2018	50	männlich	Deutschland	1	Ja	etwa im Durchschnitt	Ja	Labor																												0		w/o punish
180509_0945	Leipzig	13	Dictator	-5		-5	5	Loss	25	1061	2018	50	weiblich	Deutschland	1	Ja	unter dem Durchschnitt	Nein	Labor																												0		w/o punish
180420_1539	Leipzig	17	Receiver		5	5	7	Gain	37	1091	2018		weiblich	EU	0	Ja	unter dem Durchschnitt	Ja	Labor																												0		w/o punish
180511_1531	Leipzig	8	Dictator	-5		-5	2	Loss	21	1055	2018	50	weiblich	Deutschland	1	Ja	ueber dem Durchschnitt	Ja	Labor																												0		w/o punish
210804_1243	Magdeburg	9	Receiver		-5	-5	7	Loss	23	2021358	2021		weiblich	Deutschland	1	Ja	ueber dem Durchschnitt	Ja	Online	0																											0		w/o punish
210701_1641	Leipzig	7	Dictator	9		9	6	Gain	27	2021227	2021	90	weiblich	Deutschland	1	Nein	ueber dem Durchschnitt	Ja	Online																												0		w/o punish
180529_1024	Magdeburg	16	Receiver		-10	-10	3	Loss	21	2016	2018		weiblich	Deutschland	1	Ja	weit unter dem Durchschnitt	Ja	Labor																												0		w/o punish
180420_1539	Leipzig	4	Receiver		5	5	4	Gain	28	1078	2018		weiblich	Deutschland	1	Nein	etwa im Durchschnitt	Nein	Labor																												0		w/o punish
210803_1006	Magdeburg	14	Dictator	5		5	1	Gain	24	2021264	2021	50	weiblich	Deutschland	1	Ja	etwa im Durchschnitt	Ja	Online	0																											0		w/o punish
180420_1539	Leipzig	2	Receiver		4.5	4.5	1	Gain	28	1076	2018		weiblich	Deutschland	1	Ja	unter dem Durchschnitt	Ja	Labor																												0		w/o punish
180529_1024	Magdeburg	6	Receiver		-5.5	-5.5	7	Loss	28	2006	2018		weiblich	Deutschland	1	Ja	weit unter dem Durchschnitt	Nein	Labor																												0		w/o punish
180531_1048	Magdeburg	14	Dictator	7.5		7.5	8	Gain	22	2068	2018	75	männlich	Deutschland	1	Ja	unter dem Durchschnitt	Ja	Labor																												0		w/o punish
180529_1024	Magdeburg	13	Receiver		-5	-5	12	Loss	27	2013	2018		männlich	Deutschland	1	Ja	etwa im Durchschnitt	Ja	Labor																												0		w/o punish
180531_1048	Magdeburg	6	Dictator	10		10	6	Gain	20	2060	2018	100	weiblich	Deutschland	1	Ja	etwa im Durchschnitt	Ja	Labor																												0		w/o punish
180509_0945	Leipzig	9	Dictator	-5		-5	4	Loss	20	1053	2018	50	weiblich	Deutschland	1	Ja	etwa im Durchschnitt	Nein	Labor																												0		w/o punish
180529_1024	Magdeburg	3	Dictator	0		0	8	Loss	21	2003	2018	100	männlich	Deutschland	1	Ja	ueber dem Durchschnitt	Nein	Labor																												0		w/o punish
210520_1000	Leipzig	4	Dictator	5		5	6	Gain	26	2021004	2021	50	männlich	Deutschland	1	Nein	keine Angabe	Ja	Online																												0		w/o punish
180420_1539	Leipzig	10	Receiver		9	9	5	Gain	20	1084	2018		weiblich	Deutschland	1	Ja	etwa im Durchschnitt	Nein	Labor																												0		w/o punish
210804_1243	Magdeburg	19	Dictator	-1		-1	1	Loss	27	2021326	2021	90	männlich	Andere	0	Ja	unter dem Durchschnitt	Nein	Online	0																											0		w/o punish
210520_1000	Leipzig	2	Dictator	6		6	2	Gain	24	2021002	2021	60	weiblich	Deutschland	1	Ja	keine Angabe	Nein	Online																												0		w/o punish
180321_1348	Leipzig	5	Receiver		4.5	4.5	6	Gain	27	1014	2018		weiblich	Deutschland	1	Ja	etwa im Durchschnitt	Ja	Labor																												0		w/o punish
180531_1048	Magdeburg	17	Dictator	10		10	1	Gain	23	2071	2018	100	männlich	Deutschland	1	Ja	etwa im Durchschnitt	Ja	Labor																												0		w/o punish
210804_1243	Magdeburg	7	Receiver		-9	-9	1	Loss	24	2021339	2021		weiblich	Deutschland	1	Ja	ueber dem Durchschnitt	Ja	Online	0																											0		w/o punish
180531_1048	Magdeburg	13	Dictator	10		10	4	Gain	20	2067	2018	100	männlich	EU	0	Ja	ueber dem Durchschnitt	Ja	Labor																												0		w/o punish
180529_1024	Magdeburg	15	Receiver		-7.5	-7.5	11	Loss	26	2015	2018		weiblich	Deutschland	1	Ja	ueber dem Durchschnitt	Ja	Labor																												0		w/o punish
180321_1348	Leipzig	6	Dictator	5.5		5.5	6	Gain	28	1015	2018	55	weiblich	Deutschland	1	Ja	unter dem Durchschnitt	Ja	Labor																												0		w/o punish
210803_1006	Magdeburg	12	Receiver		0	0	3	Gain	23	2021262	2021		weiblich	Deutschland	1	Ja	etwa im Durchschnitt	Ja	Online	0																											0		w/o punish
210803_1006	Magdeburg	13	Dictator	5		5	4	Gain	25	2021263	2021	50	männlich	Deutschland	1	Ja	etwa im Durchschnitt	Ja	Online	0																											0		w/o punish
210804_1507	Magdeburg	13	Receiver		-8	-8	1	Loss	30	2021352	2021		weiblich	Deutschland	1	Ja	etwa im Durchschnitt	Ja	Online	0																											0		w/o punish
210803_1006	Magdeburg	10	Receiver		5	5	8	Gain	27	2021260	2021		männlich	Deutschland	1	Ja	ueber dem Durchschnitt	Ja	Online	0																											0		w/o punish
210804_1243	Magdeburg	8	Dictator	-5		-5	4	Loss		2021301	2021	50	.a			Nein	keine Angabe	Nein	Online	0																											0		w/o punish
180529_1024	Magdeburg	7	Receiver		-7	-7	13	Loss	24	2007	2018		weiblich	Deutschland	1	Ja	etwa im Durchschnitt	Ja	Labor																												0		w/o punish
180531_1048	Magdeburg	10	Dictator	3		3	7	Gain	23	2064	2018	30	männlich	Deutschland	1	Ja	etwa im Durchschnitt	Ja	Labor																												0		w/o punish
180529_1024	Magdeburg	1	Dictator	0		0	3	Loss	27	2001	2018	100	männlich	Deutschland	1	Ja	ueber dem Durchschnitt	Nein	Labor																												0		w/o punish
180321_1348	Leipzig	1	Receiver		4	4	4	Gain	23	1010	2018		weiblich	Andere	0	Ja	etwa im Durchschnitt	Ja	Labor																												0		w/o punish
210520_1000	Leipzig	10	Receiver		5	5	6	Gain	28	2021010	2021		weiblich	Deutschland	1	Ja	weit unter dem Durchschnitt	Nein	Online																												0		w/o punish
180420_1539	Leipzig	7	Dictator	5.5		5.5	1	Gain	26	1081	2018	55	weiblich	Deutschland	1	Ja	etwa im Durchschnitt	Ja	Labor																												0		w/o punish
180321_1348	Leipzig	12	Receiver		5	5	2	Gain	34	1021	2018		männlich	Deutschland	1	Ja	etwa im Durchschnitt	Ja	Labor																												0		w/o punish
210804_1243	Magdeburg	11	Receiver		-5	-5	4	Loss	33	2021344	2021		männlich	Deutschland	1	Ja	unter dem Durchschnitt	Nein	Online	0																											0		w/o punish
210803_1006	Magdeburg	8	Receiver		5	5	9	Gain	29	2021258	2021		männlich	Deutschland	1	Ja	ueber dem Durchschnitt	Ja	Online	0																											0		w/o punish
180529_1024	Magdeburg	25	Receiver		-8	-8	9	Loss	24	2025	2018		männlich	Deutschland	1	Ja	weit ueber dem Durchschnitt	Nein	Labor																												0		w/o punish
210701_1641	Leipzig	5	Dictator	7.5		7.5	5	Gain	32	2021225	2021	75	weiblich	Deutschland	1	Nein	etwa im Durchschnitt	Ja	Online																												0		w/o punish
180321_1348	Leipzig	7	Dictator	6		6	3	Gain	21	1016	2018	60	weiblich	Deutschland	1	Ja	etwa im Durchschnitt	Ja	Labor																												0		w/o punish
180420_1539	Leipzig	3	Dictator	5		5	7	Gain	30	1077	2018	50	weiblich	Deutschland	1	Nein	etwa im Durchschnitt	Nein	Labor																												0		w/o punish
180529_1024	Magdeburg	23	Dictator	-3		-3	13	Loss	21	2023	2018	70	männlich	Deutschland	1	Ja	etwa im Durchschnitt	Nein	Labor																												0		w/o punish
180420_1539	Leipzig	16	Receiver		5	5	2	Gain	24	1090	2018		weiblich	Deutschland	1	Ja	etwa im Durchschnitt	Ja	Labor																												0		w/o punish
210804_1507	Magdeburg	1	Dictator	-4		-4	5	Loss	24	2021333	2021	60	männlich	Deutschland	1	Ja	unter dem Durchschnitt	Ja	Online	0																											0		w/o punish
180529_1024	Magdeburg	10	Dictator	0		0	2	Loss	23	2010	2018	100	männlich	Andere	0	Ja	etwa im Durchschnitt	Nein	Labor																												0		w/o punish
180531_1048	Magdeburg	3	Receiver		0	0	10	Gain	29	2057	2018		männlich	Deutschland	1	Ja	etwa im Durchschnitt	Nein	Labor																												0		w/o punish
210804_1243	Magdeburg	10	Dictator	0		0	8	Loss	25	2021334	2021	100	männlich	Deutschland	1	Ja	weit ueber dem Durchschnitt	Ja	Online	0																											0		w/o punish
210804_1243	Magdeburg	4	Receiver		-10	-10	3	Loss	27	2021354	2021		männlich	Deutschland	1	Ja	ueber dem Durchschnitt	Ja	Online	0																											0		w/o punish
180509_0945	Leipzig	5	Dictator	-5		-5	1	Loss	23	1026	2018	50	männlich	Deutschland	1	Ja	etwa im Durchschnitt	Ja	Labor																												0		w/o punish
180529_1024	Magdeburg	17	Receiver		-7	-7	5	Loss	19	2017	2018		weiblich	Deutschland	1	Ja	etwa im Durchschnitt	Ja	Labor																												0		w/o punish
210520_1000	Leipzig	8	Dictator	5		5	1	Gain	24	2021008	2021	50	weiblich	Deutschland	1	Ja	etwa im Durchschnitt	Ja	Online																												0		w/o punish
180529_1024	Magdeburg	26	Dictator	0		0	4	Loss	22	2026	2018	100	weiblich	Deutschland	1	Ja	etwa im Durchschnitt	Ja	Labor																												0		w/o punish
180321_1348	Leipzig	8	Dictator	6		6	4	Gain	25	1017	2018	60	weiblich	Deutschland	1	Ja	etwa im Durchschnitt	Ja	Labor																												0		w/o punish
180529_1024	Magdeburg	21	Dictator	-5		-5	12	Loss	22	2021	2018	50	männlich	EU	0	Ja	weit ueber dem Durchschnitt	Ja	Labor																												0		w/o punish
180321_1348	Leipzig	10	Receiver		4	4	1	Gain	24	1019	2018		männlich	Deutschland	1	Ja	ueber dem Durchschnitt	Ja	Labor																												0		w/o punish
210804_1507	Magdeburg	4	Receiver		-10	-10	2	Loss	25	2021345	2021		männlich	Deutschland	1	Ja	etwa im Durchschnitt	Ja	Online	0																											0		w/o punish
180511_1531	Leipzig	2	Receiver		-5	-5	2	Loss	78	1051	2018		männlich	Deutschland	1	Nein	unter dem Durchschnitt	Nein	Labor																												0		w/o punish
210804_1507	Magdeburg	8	Dictator	0		0	4	Loss	21	2021355	2021	100	männlich	Deutschland	1	Ja	etwa im Durchschnitt	Nein	Online	0																											0		w/o punish
180509_0945	Leipzig	10	Receiver		-8	-8	6	Loss	20	1049	2018		weiblich	Deutschland	1	Ja	ueber dem Durchschnitt	Ja	Labor																												0		w/o punish
210803_1006	Magdeburg	3	Dictator	10		10	3	Gain	23	2021253	2021	100	männlich	Deutschland	1	Ja	weit ueber dem Durchschnitt	Ja	Online	0																											0		w/o punish
180509_0945	Leipzig	3	Receiver		-5	-5	3	Loss	23	1057	2018		männlich	Deutschland	1	Ja	ueber dem Durchschnitt	Nein	Labor																												0		w/o punish
180420_1539	Leipzig	8	Dictator	5		5	3	Gain	24	1082	2018	50	weiblich	Deutschland	1	Ja	unter dem Durchschnitt	Ja	Labor																												0		w/o punish
180531_1048	Magdeburg	20	Receiver		0	0	4	Gain	29	2074	2018		weiblich	Andere	0	Ja	etwa im Durchschnitt	Nein	Labor																												0		w/o punish
180420_1539	Leipzig	12	Receiver		5	5	6	Gain	24	1086	2018		männlich	Deutschland	1	Ja	keine Angabe	Nein	Labor																												0		w/o punish
210804_1507	Magdeburg	9	Receiver		-5	-5	9	Loss	28	2021341	2021		männlich	Deutschland	1	Ja	ueber dem Durchschnitt	Ja	Online	0																											0		w/o punish
210804_1243	Magdeburg	1	Dictator	-5		-5	10	Loss	22	2021361	2021	50	weiblich	Deutschland	1	Ja	ueber dem Durchschnitt	Nein	Online	0																											0		w/o punish
180404_1546	Leipzig	5	Dictator	-5		-5	4	Loss	25	1007	2018	50	männlich	Deutschland	1	Ja	etwa im Durchschnitt	Ja	Labor																												0		w/o punish
180529_1024	Magdeburg	24	Dictator	-3		-3	5	Loss	20	2024	2018	70	weiblich	Deutschland	1	Ja	etwa im Durchschnitt	Nein	Labor																												0		w/o punish
210803_1006	Magdeburg	1	Receiver		4	4	10	Gain	21	2021251	2021		weiblich	Deutschland	1	Ja	keine Angabe	Ja	Online	0																											0		w/o punish
210520_1000	Leipzig	13	Receiver		5	5	4	Gain	25	2021013	2021		männlich	Deutschland	1	Ja	weit unter dem Durchschnitt	Ja	Online																												0		w/o punish
180511_1531	Leipzig	4	Dictator	-5		-5	1	Loss	18	1043	2018	50	weiblich	Andere	0	Ja	etwa im Durchschnitt	Nein	Labor																												0		w/o punish
180404_1546	Leipzig	2	Receiver		-6	-6	2	Loss	32	1009	2018		weiblich	Andere	0	Ja	ueber dem Durchschnitt	Ja	Labor																												0		w/o punish
210520_1000	Leipzig	3	Receiver		5	5	5	Gain	25	2021003	2021		weiblich	Deutschland	1	Ja	etwa im Durchschnitt	Ja	Online																												0		w/o punish
180531_1048	Magdeburg	8	Receiver		0	0	1	Gain	24	2062	2018		weiblich	Deutschland	1	Ja	etwa im Durchschnitt	Ja	Labor																												0		w/o punish
180511_1531	Leipzig	6	Dictator	-5		-5	3	Loss	30	1032	2018	50	weiblich	Deutschland	1	Nein	unter dem Durchschnitt	Nein	Labor																												0		w/o punish
180531_1048	Magdeburg	5	Dictator	5.5		5.5	3	Gain	21	2059	2018	55	weiblich	Deutschland	1	Ja	etwa im Durchschnitt	Ja	Labor																												0		w/o punish
180531_1048	Magdeburg	15	Receiver		1	1	9	Gain	26	2069	2018		männlich	Deutschland	1	Ja	etwa im Durchschnitt	Ja	Labor																												0		w/o punish
210701_1641	Leipzig	10	Receiver		2.5	2.5	5	Gain	35	2021230	2021		weiblich	Deutschland	1	Ja	weit unter dem Durchschnitt	Ja	Online																												0		w/o punish
210701_1641	Leipzig	3	Receiver		0	0	4	Gain	26	2021223	2021		weiblich	Deutschland	1	Ja	etwa im Durchschnitt	Nein	Online																												0		w/o punish
180420_1539	Leipzig	5	Dictator	5		5	4	Gain	21	1079	2018	50	männlich	Deutschland	1	Ja	etwa im Durchschnitt	Ja	Labor																												0		w/o punish
210701_1641	Leipzig	11	Receiver		4.5	4.5	1	Gain		2021231	2021							Ja	Online																												0		w/o punish
180531_1048	Magdeburg	9	Receiver		4.5	4.5	3	Gain	22	2063	2018		weiblich	Deutschland	1	Ja	ueber dem Durchschnitt	Ja	Labor																												0		w/o punish
180511_1531	Leipzig	3	Dictator	0		0	4	Loss	26	1040	2018	100	männlich	Deutschland	1	Ja	unter dem Durchschnitt	Ja	Labor																												0		w/o punish
210803_1006	Magdeburg	15	Receiver		5	5	2	Gain	25	2021265	2021		weiblich	Deutschland	1	Ja	etwa im Durchschnitt	Nein	Online	0																											0		w/o punish
180529_1024	Magdeburg	12	Receiver		-10	-10	8	Loss	24	2012	2018		weiblich	Deutschland	1	Ja	etwa im Durchschnitt	Nein	Labor																												0		w/o punish
210804_1243	Magdeburg	5	Dictator	0		0	9	Loss	24	2021335	2021	100	männlich	Deutschland	1	Ja	etwa im Durchschnitt	Nein	Online	0																											0		w/o punish
210520_1000	Leipzig	6	Receiver		5	5	1	Gain	29	2021006	2021		weiblich	Deutschland	1	Ja	unter dem Durchschnitt	Ja	Online																												0		w/o punish
210804_1507	Magdeburg	17	Receiver		-10	-10	6	Loss	26	2021337	2021		weiblich	Deutschland	1	Ja	unter dem Durchschnitt	Ja	Online	0																											0		w/o punish
210804_1243	Magdeburg	6	Dictator	0		0	3	Loss	30	2021342	2021	100	männlich	Deutschland	1	Ja	etwa im Durchschnitt	Nein	Online	0																											0		w/o punish
210804_1507	Magdeburg	14	Dictator	-5		-5	3	Loss	25	2021331	2021	50	weiblich	Deutschland	1	Ja	etwa im Durchschnitt	Ja	Online	0																											0		w/o punish
180404_1546	Leipzig	7	Receiver		-5	-5	4	Loss	24	1004	2018		männlich	Deutschland	1	Ja	unter dem Durchschnitt	Ja	Labor																												0		w/o punish
210804_1507	Magdeburg	12	Receiver		-5	-5	8	Loss	26	2021348	2021		männlich	Deutschland	1	Ja	weit unter dem Durchschnitt	Ja	Online	0																											0		w/o punish
180531_1048	Magdeburg	1	Receiver		0	0	2	Gain	26	2055	2018		weiblich	Deutschland	1	Ja	unter dem Durchschnitt	Ja	Labor																												0		w/o punish
210804_1507	Magdeburg	6	Dictator	0		0	2	Loss	23	2021360	2021	100	weiblich	Deutschland	1	Ja	etwa im Durchschnitt	Ja	Online	0																											0		w/o punish
180404_1546	Leipzig	9	Receiver		-6	-6	1	Loss	23	1001	2018		weiblich	Deutschland	1	Ja	unter dem Durchschnitt	Ja	Labor																												0		w/o punish
180511_1531	Leipzig	7	Receiver		-10	-10	4	Loss	25	1060	2018		weiblich	Deutschland	1	Ja	unter dem Durchschnitt	Ja	Labor																												0		w/o punish
180404_1546	Leipzig	8	Receiver		-5	-5	3	Loss	54	1006	2018		weiblich	Deutschland	1	Nein	unter dem Durchschnitt	Nein	Labor																												0		w/o punish
210804_1507	Magdeburg	15	Dictator	-5		-5	8	Loss	22	2021340	2021	50	weiblich	Deutschland	1	Ja	ueber dem Durchschnitt	Ja	Online	0																											0		w/o punish
180531_1048	Magdeburg	18	Receiver		2.5	2.5	8	Gain	24	2072	2018		männlich	Deutschland	1	Ja	keine Angabe	Ja	Labor																												0		w/o punish
210804_1243	Magdeburg	18	Receiver		-10	-10	8	Loss	33	2021332	2021		männlich	Deutschland	1	Ja	etwa im Durchschnitt	Ja	Online	0																											0		w/o punish
210803_1006	Magdeburg	18	Dictator	5		5	2	Gain	24	2021268	2021	50	weiblich	Deutschland	1	Ja	etwa im Durchschnitt	Nein	Online	0																											0		w/o punish
210804_1243	Magdeburg	15	Dictator	-5		-5	6	Loss	24	2021329	2021	50	männlich	Deutschland	1	Ja	etwa im Durchschnitt	Ja	Online	0																											0		w/o punish
210804_1507	Magdeburg	11	Receiver		-6	-6	5	Loss	21	2021336	2021		weiblich	Deutschland	1	Ja	etwa im Durchschnitt	Ja	Online	0																											0		w/o punish
210804_1243	Magdeburg	12	Receiver		-5	-5	6	Loss	23	2021347	2021		männlich	Deutschland	1	Ja	unter dem Durchschnitt	Ja	Online	0																											0		w/o punish
180404_1546	Leipzig	4	Dictator	-5		-5	3	Loss	23	1005	2018	50	weiblich	Deutschland	1	Ja	etwa im Durchschnitt	Ja	Labor																												0		w/o punish
210804_1243	Magdeburg	13	Dictator	-5		-5	2	Loss	23	2021359	2021	50	männlich	Deutschland	1	Ja	etwa im Durchschnitt	Nein	Online	0																											0		w/o punish
210804_1243	Magdeburg	2	Receiver		-5	-5	2	Loss	26	2021350	2021		männlich	Deutschland	1	Ja	weit unter dem Durchschnitt	Ja	Online	0																											0		w/o punish
210803_1006	Magdeburg	6	Dictator	6		6	10	Gain	26	2021256	2021	60	weiblich	Deutschland	1	Ja	etwa im Durchschnitt	Ja	Online	0																											0		w/o punish
180529_1024	Magdeburg	22	Dictator	-2		-2	1	Loss	28	2022	2018	80	weiblich	Deutschland	1	Ja	unter dem Durchschnitt	Ja	Labor																												0		w/o punish
210803_1006	Magdeburg	17	Dictator	5		5	7	Gain	23	2021267	2021	50	weiblich	Deutschland	1	Ja	etwa im Durchschnitt	Ja	Online	0																											0		w/o punish
210804_1507	Magdeburg	2	Dictator	-5		-5	9	Loss	25	2021349	2021	50	männlich	Deutschland	1	Ja	unter dem Durchschnitt	Ja	Online	0																											0		w/o punish
210804_1243	Magdeburg	16	Receiver		-10	-10	5	Loss	35	2021351	2021		männlich	Deutschland	1	Ja	etwa im Durchschnitt	Ja	Online	0																											0		w/o punish
210803_1006	Magdeburg	7	Receiver		5	5	1	Gain	24	2021257	2021		weiblich	Deutschland	1	Ja	ueber dem Durchschnitt	Ja	Online	0																											0		w/o punish
180529_1024	Magdeburg	14	Dictator	-4		-4	10	Loss	23	2014	2018	60	weiblich	Deutschland	1	Ja	ueber dem Durchschnitt	Nein	Labor																												0		w/o punish
210803_1006	Magdeburg	5	Receiver		0	0	5	Gain	30	2021255	2021		weiblich	Deutschland	1	Ja	etwa im Durchschnitt	Ja	Online	0																											0		w/o punish
180420_1539	Leipzig	14	Dictator	5		5	8	Gain	23	1088	2018	50	weiblich	Deutschland	1	Ja	etwa im Durchschnitt	Ja	Labor																												0		w/o punish
180511_1531	Leipzig	1	Receiver		-5	-5	1	Loss	30	1063	2018		weiblich	Deutschland	1	Ja	weit unter dem Durchschnitt	Nein	Labor																												0		w/o punish
210804_1507	Magdeburg	16	Receiver		-5	-5	3	Loss	26	2021346	2021		männlich	Deutschland	1	Ja	ueber dem Durchschnitt	Ja	Online	0																											0		w/o punish
210804_1243	Magdeburg	17	Dictator	-5		-5	7	Loss	25	2021328	2021	50	männlich	Deutschland	1	Ja	unter dem Durchschnitt	Ja	Online	0																											0		w/o punish
180529_1024	Magdeburg	9	Receiver		-10	-10	4	Loss	19	2009	2018		weiblich	Deutschland	1	Ja	etwa im Durchschnitt	Nein	Labor																												0		w/o punish
180509_0945	Leipzig	2	Dictator	-2		-2	6	Loss	26	1028	2018	80	männlich	Deutschland	1	Ja	ueber dem Durchschnitt	Nein	Labor																												0		w/o punish
210804_1507	Magdeburg	5	Dictator	0		0	6	Loss	21	2021353	2021	100	weiblich	Deutschland	1	Ja	weit ueber dem Durchschnitt	Ja	Online	0																											0		w/o punish
180420_1539	Leipzig	13	Dictator	1		1	5	Gain	24	1087	2018	10	weiblich	Deutschland	1	Ja	unter dem Durchschnitt	Ja	Labor																												0		w/o punish
180531_1048	Magdeburg	19	Receiver		7	7	7	Gain	21	2073	2018		weiblich	Deutschland	1	Ja	etwa im Durchschnitt	Ja	Labor																												0		w/o punish
180531_1048	Magdeburg	2	Dictator	10		10	5	Gain	23	2056	2018	100	männlich	Deutschland	1	Ja	unter dem Durchschnitt	Ja	Labor																												0		w/o punish
180531_1048	Magdeburg	16	Dictator	10		10	10	Gain	28	2070	2018	100	männlich	Deutschland	1	Ja	etwa im Durchschnitt	Ja	Labor																												0		w/o punish
180420_1539	Leipzig	6	Receiver		5	5	8	Gain	35	1080	2018		weiblich	Deutschland	1	Nein	ueber dem Durchschnitt	Ja	Labor																												0		w/o punish
180420_1539	Leipzig	9	Dictator	5		5	2	Gain	19	1083	2018	50	weiblich	Deutschland	1	Ja	etwa im Durchschnitt	Ja	Labor																												0		w/o punish
180531_1048	Magdeburg	12	Dictator	9		9	9	Gain	28	2066	2018	90	weiblich	Deutschland	1	Ja	weit unter dem Durchschnitt	Ja	Labor																												0		w/o punish
180531_1048	Magdeburg	11	Dictator	10		10	2	Gain	23	2065	2018	100	männlich	Deutschland	1	Ja	ueber dem Durchschnitt	Ja	Labor																												0		w/o punish
180529_1024	Magdeburg	18	Receiver		-6	-6	10	Loss	32	2018	2018		männlich	Deutschland	1	Ja	etwa im Durchschnitt	Nein	Labor																												0		w/o punish
180404_1546	Leipzig	3	Dictator	-4		-4	2	Loss	29	1008	2018	60	weiblich	Deutschland	1	Ja	etwa im Durchschnitt	Ja	Labor																												0		w/o punish
180529_1024	Magdeburg	11	Receiver		-10	-10	6	Loss	32	2011	2018		männlich	Deutschland	1	Ja	weit ueber dem Durchschnitt	Ja	Labor																												0		w/o punish
180531_1048	Magdeburg	7	Receiver		0	0	6	Gain	23	2061	2018		männlich	Deutschland	1	Ja	ueber dem Durchschnitt	Ja	Labor																												0		w/o punish
180509_0945	Leipzig	4	Dictator	-4		-4	2	Loss	21	1066	2018	60	weiblich	Deutschland	1	Ja	ueber dem Durchschnitt	Ja	Labor																												0		w/o punish
210803_1006	Magdeburg	20	Receiver		3	3	6	Gain	26	2021270	2021		männlich	Deutschland	1	Ja	weit unter dem Durchschnitt	Ja	Online	0																											0		w/o punish
210701_1641	Leipzig	9	Dictator	5		5	3	Gain	32	2021229	2021	50	weiblich	Deutschland	1	Nein	etwa im Durchschnitt	Ja	Online																												0		w/o punish
180321_1348	Leipzig	2	Dictator	5		5	2	Gain	25	1011	2018	50	weiblich	Deutschland	1	Ja	unter dem Durchschnitt	Nein	Labor																												0		w/o punish
180420_1539	Leipzig	1	Dictator	6		6	9	Gain	25	1075	2018	60	weiblich	Deutschland	1	Ja	etwa im Durchschnitt	Ja	Labor																												0		w/o punish
180529_1024	Magdeburg	19	Dictator	-2.5		-2.5	11	Loss	20	2019	2018	75	weiblich	Deutschland	1	Ja	ueber dem Durchschnitt	Nein	Labor																												0		w/o punish
180509_0945	Leipzig	6	Receiver		-5	-5	5	Loss	22	1041	2018		männlich	Deutschland	1	Ja	etwa im Durchschnitt	Nein	Labor																												0		w/o punish
210803_1006	Magdeburg	16	Dictator	5		5	8	Gain	21	2021266	2021	50	weiblich	Deutschland	1	Ja	etwa im Durchschnitt	Nein	Online	0																											0		w/o punish
210520_1000	Leipzig	7	Dictator	5.5		5.5	7	Gain	30	2021007	2021	55	weiblich	Deutschland	1	Ja	keine Angabe	Nein	Online																												0		w/o punish
210701_1641	Leipzig	2	Dictator	5		5	2	Gain	25	2021222	2021	50	weiblich	Deutschland	1	Ja	ueber dem Durchschnitt	Ja	Online																												0		w/o punish
210803_1006	Magdeburg	2	Receiver		5	5	4	Gain	28	2021252	2021		männlich	Deutschland	1	Ja	ueber dem Durchschnitt	Ja	Online	0																											0		w/o punish
210803_1006	Magdeburg	19	Dictator	10		10	5	Gain	28	2021269	2021	100	männlich	Deutschland	1	Ja	weit unter dem Durchschnitt	Ja	Online	0																											0		w/o punish
180420_1539	Leipzig	15	Receiver		5	5	3	Gain	22	1089	2018		weiblich	Deutschland	1	Ja	weit ueber dem Durchschnitt	Ja	Labor																												0		w/o punish
180509_0945	Leipzig	8	Receiver		-5	-5	4	Loss	26	1047	2018		männlich	Deutschland	1	Ja	unter dem Durchschnitt	Ja	Labor																												0		w/o punish
180529_1024	Magdeburg	2	Dictator	0		0	6	Loss	29	2002	2018	100	männlich	Deutschland	1	Ja	etwa im Durchschnitt	Ja	Labor																												0		w/o punish
180531_1048	Magdeburg	4	Receiver		0	0	5	Gain	31	2058	2018		männlich	EU	0	Ja	weit unter dem Durchschnitt	Ja	Labor																												0		w/o punish
210520_1000	Leipzig	12	Dictator	5		5	4	Gain	32	2021012	2021	50	weiblich	Deutschland	1	Nein	etwa im Durchschnitt	Nein	Online																												0		w/o punish
180509_0945	Leipzig	7	Receiver		-5	-5	1	Loss	23	1062	2018		weiblich	Deutschland	1	Ja	etwa im Durchschnitt	Ja	Labor																												0		w/o punish
210804_1243	Magdeburg	3	Dictator	0		0	5	Loss	20	2021338	2021	100	weiblich	Deutschland	1	Ja	ueber dem Durchschnitt	Ja	Online	0																											0		w/o punish
180529_1024	Magdeburg	20	Receiver		-8	-8	1	Loss	31	2020	2018		männlich	Deutschland	1	Ja	ueber dem Durchschnitt	Ja	Labor																												0		w/o punish
210804_1507	Magdeburg	7	Dictator	-3		-3	7	Loss	24	2021356	2021	70	weiblich	Deutschland	1	Ja	etwa im Durchschnitt	Ja	Online	0																											0		w/o punish
210701_1641	Leipzig	13	Receiver		5	5	2	Gain	29	2021233	2021		männlich	Deutschland	1	Ja	weit ueber dem Durchschnitt	Nein	Online																												0		w/o punish
210520_1000	Leipzig	1	Receiver		4.5	4.5	7	Gain	25	2021001	2021		männlich	Deutschland	1	Ja	etwa im Durchschnitt	Ja	Online																												0		w/o punish
210520_1000	Leipzig	5	Dictator	5		5	5	Gain	30	2021005	2021	50	weiblich	Deutschland	1	Ja	unter dem Durchschnitt	Ja	Online																												0		w/o punish
180529_1024	Magdeburg	8	Receiver		-10	-10	2	Loss	24	2008	2018		männlich	Deutschland	1	Ja	etwa im Durchschnitt	Nein	Labor																												0		w/o punish
210804_1243	Magdeburg	14	Receiver		-10	-10	9	Loss	24	2021357	2021		weiblich	Deutschland	1	Ja	ueber dem Durchschnitt	Ja	Online	0																											0		w/o punish
180420_1539	Leipzig	11	Dictator	5		5	6	Gain	29	1085	2018	50	weiblich	Deutschland	1	Ja	ueber dem Durchschnitt	Ja	Labor																												0		w/o punish
180529_1024	Magdeburg	5	Dictator	-2		-2	9	Loss	22	2005	2018	80	männlich	Andere	0	Ja	etwa im Durchschnitt	Nein	Labor																												0		w/o punish
210701_1641	Leipzig	8	Receiver		5	5	3	Gain	31	2021228	2021		männlich	Deutschland	1	Ja	unter dem Durchschnitt	Ja	Online																												0		w/o punish
180321_1348	Leipzig	4	Dictator	6		6	1	Gain	30	1013	2018	60	weiblich	Deutschland	1	Nein	keine Angabe	Ja	Labor																												0		w/o punish
180321_1348	Leipzig	9	Receiver		5	5	5	Gain	35	1018	2018		weiblich	Andere	0	Ja	keine Angabe	Ja	Labor																												0		w/o punish
210804_1507	Magdeburg	18	Receiver		-7	-7	7	Loss	22	2021343	2021		weiblich	Deutschland	1	Ja	weit unter dem Durchschnitt	Ja	Online	0																											0		w/o punish
210803_1006	Magdeburg	9	Dictator	7		7	6	Gain	26	2021259	2021	70	weiblich	Deutschland	1	Ja	unter dem Durchschnitt	Ja	Online	0																											0		w/o punish
180321_1348	Leipzig	11	Receiver		4	4	3	Gain	27	1020	2018		weiblich	Deutschland	1	Ja	weit unter dem Durchschnitt	Nein	Labor																												0		w/o punish
180509_0945	Leipzig	11	Dictator	-5		-5	3	Loss	30	1037	2018	50	weiblich	Deutschland	1	Ja	etwa im Durchschnitt	Ja	Labor																												0		w/o punish
210803_1006	Magdeburg	4	Receiver		5	5	7	Gain	28	2021254	2021		männlich	Deutschland	1	Ja	weit unter dem Durchschnitt	Ja	Online	0																											0		w/o punish
210701_1641	Leipzig	4	Dictator	5.5		5.5	1	Gain	31	2021224	2021	55	weiblich	Deutschland	1	Nein	ueber dem Durchschnitt	Ja	Online																												0		w/o punish
210520_1000	Leipzig	14	Dictator	6		6	3	Gain	28	2021014	2021	60	weiblich	Deutschland	1	Ja	keine Angabe	Ja	Online																												0		w/o punish
180511_1531	Leipzig	5	Receiver		-5	-5	3	Loss	20	1039	2018		weiblich	Deutschland	1	Ja	etwa im Durchschnitt	Nein	Labor																												0		w/o punish
210520_1000	Leipzig	11	Receiver		4	4	3	Gain	27	2021011	2021		weiblich	Deutschland	1	Ja	etwa im Durchschnitt	Ja	Online																												0		w/o punish
180404_1546	Leipzig	1	Dictator	-5		-5	5	Loss	24	1003	2018	50	weiblich	Deutschland	1	Ja	ueber dem Durchschnitt	Ja	Labor																												0		w/o punish
210520_1000	Leipzig	9	Receiver		4	4	2	Gain	31	2021009	2021		weiblich	Deutschland	1	Ja	unter dem Durchschnitt	Ja	Online																												0		w/o punish
180404_1546	Leipzig	6	Dictator	-4		-4	1	Loss	27	1002	2018	60	weiblich	Deutschland	1	Ja	unter dem Durchschnitt	Ja	Labor																												0		w/o punish
211201_1242	Magdeburg	4	Dictator	-5	-5	-5	3	Loss	24	2021879	2021	50	weiblich	EU	0	Ja	etwa im Durchschnitt	Ja	Online	0	0			0.5	0	0	0	0	0	1	0	0	0	0	0	0	0	0	0	0	1	0	0	0	0	0	1	0	punish 2:1
211209_1338	Leipzig	2	Dictator	10	0	9	2	Gain	26	2021753	2021	100	männlich	Deutschland	1	Ja	unter dem Durchschnitt	Ja	Online	0	1	0		0.5	0	0	0	0	0	1	0	0	0	0	0	0	0	0	0	0	1	0	0	0	0	0	1	0	punish 2:1
211202_1330	Leipzig	7	Dictator	-5	-5	-5	8	Loss	33	2021849	2021	50	weiblich	Deutschland	1	Ja	unter dem Durchschnitt	Nein	Online	0	0			0.5	0	0	0	0	0	1	0	0	0	0	0	0	0	0	0	0	1	0	0	0	0	0	1	0	punish 2:1
211202_1330	Leipzig	4	Punisher	-5	-5		5	Loss	30	2021834	2021		weiblich	Deutschland	1	Ja	weit unter dem Durchschnitt	Ja	Online	1		0		0.5	0	0	0	0	0	1	0	0	0	0	0	0	0	0	0	0	1	0	0	0	0	0	1	0	punish 2:1
211123_0930	Magdeburg	2	Dictator	10	0	10	9	Gain	25	2021602	2021	100	weiblich	Deutschland	1	Ja	etwa im Durchschnitt	Ja	Online	0	0	0		0.5	0	0	0	0	0	1	0	0	0	0	0	0	0	0	0	0	1	0	0	0	0	0	1	0	punish 2:1
221111_0933	Leipzig	5	Punisher	-5	-5	0	1	Loss	19	2022033	2022		weiblich	Deutschland	1	Ja	etwa im Durchschnitt	Nein	Online	0	0	0		0.5	0	0	0	0	0	1	0	0	0	0	0	0	0	0	0	0	1	0	0	0	0	0	1	0	punish 2:1
211201_1242	Magdeburg	1	Dictator	-0.5	-9.5	-0.5	4	Loss		2021819	2021	95	weiblich	Deutschland	1	Ja	weit ueber dem Durchschnitt	Nein	Online	0	0			0.5	0	0	0	0	0	1	0	0	0	0	0	0	0	0	0	0	1	0	0	0	0	0	1	1	punish 2:1
211207_0929	Leipzig	7	Punisher	5	5	10	2	Gain	30	2021701	2021		weiblich	Deutschland	1	Nein	unter dem Durchschnitt	Ja	Online	0	0	0		0.5	0	0	0	0	0	1	0	0	0	0	0	0	0	0	0	0	1	0	0	0	0	0	1	0	punish 2:1
211124_1240	Magdeburg	2	Dictator	10	0	10	5	Gain	20	2021668	2021	100	weiblich	Deutschland	1	Ja	unter dem Durchschnitt	Ja	Online	0	0	0		0.5	0	0	0	0	0	1	0	0	0	0	0	0	0	0	0	0	0	0	0	0	0	1	1	0	punish 2:1
211124_1240	Magdeburg	8	Punisher	5	5	10	7	Gain	24	2021674	2021		weiblich	Deutschland	1	Ja	ueber dem Durchschnitt	Ja	Online	0	0	0		0.5	0	0	0	0	0	1	0	0	0	0	0	0	0	0	0	0	1	0	0	0	0	0	1	0	punish 2:1
221111_0933	Leipzig	12	Punisher	-5	-5	0	5	Loss	22	2022031	2022		weiblich	Deutschland	1	Ja	unter dem Durchschnitt	Nein	Online	0	0	0		0.5	0	0	0	0	0	1	0	0	0	0	0	0	0	0	0	0	1	0	0	0	0	0	1	0	punish 2:1
211124_1240	Magdeburg	15	Dictator	6	4	6	8	Gain	23	2021681	2021	60	weiblich	Deutschland	1	Ja	etwa im Durchschnitt	Ja	Online	0	0	0		0.5	0	0	0	0	0	1	0	0	0	0	0	0	0	0	0	0	0	1	0	0	0	0	1	0	punish 2:1
221111_0933	Leipzig	8	Dictator	-4	-6	-4	2	Loss	20	2022002	2022	60	weiblich	Deutschland	1	Ja	ueber dem Durchschnitt	Nein	Online	0	0			0.5	0	0	0	0	0	1	0	0	0	0	0	0	0	0	0	0	1	0	0	0	0	0	1	0	punish 2:1
211206_1557	Leipzig	12	Punisher	-4	-6	0	2	Loss	27	2021893	2021		männlich	Deutschland	1	Ja	ueber dem Durchschnitt	Ja	Online	0	0	0		0.5	0	0	0	0	1	1	1	0	0	0	0	0	0	0	0	1	1	1	0	0	0	0	1	0	punish 2:1
211130_0938	Magdeburg	2	Dictator	0	-10	0	3	Loss		2021810	2021	100							Online	0	0			0.5	0	0	0	0	0	1	0	0	0	0	0	0	0	0	0	1	1	1	0	0	0	0	1	0	punish 2:1
211201_1242	Magdeburg	6	Punisher	-5	-5	0	1	Loss	22	2021908	2021		männlich	Deutschland	1	Ja	ueber dem Durchschnitt	Ja	Online	0	0	0		0.5	0	0	0	0	1	1	1	0	0	0	0	0	0	0	0	1	1	1	0	0	0	0	1	0	punish 2:1
211124_1240	Magdeburg	4	Dictator	5	5	5	2	Gain	23	2021670	2021	50	männlich	Deutschland	1	Ja	unter dem Durchschnitt	Ja	Online	0	0	0		0.5	0	0	0	0	0	1	0	0	0	0	0	0	0	0	0	0	1	0	0	0	0	0	1	0	punish 2:1
211206_1557	Leipzig	4	Punisher	-5	-5	0	1	Loss	31	2021884	2021		männlich	Deutschland	1	Ja	unter dem Durchschnitt	Nein	Online	0	0	0		0.5	0	0	0	0	0	1	0	0	0	0	0	0	0	0	0	0	1	0	0	0	0	0	1	0	punish 2:1
221111_0933	Leipzig	15	Punisher	-4	-6	0	2	Loss	23	2022047	2022		weiblich	Deutschland	1	Ja	etwa im Durchschnitt	Ja	Online	0	0	0		0.5	0	0	0	0	0	1	0	0	0	0	0	0	0	0	0	0	1	0	0	0	0	0	1	0	punish 2:1
211130_0938	Magdeburg	5	Punisher	0	-10	0	3	Loss		2021813	2021								Online	0	0	0		0.5	0	0	0	0	0	1	0	0	0	0	0	0	0	0	0	0	1	0	0	0	0	0	1	0	punish 2:1
211124_1240	Magdeburg	16	Dictator	9	1	9	6	Gain	33	2021682	2021	90	weiblich	Deutschland	1	Ja	weit unter dem Durchschnitt	Ja	Online	0	0	0		0.5	0	0	0	0	0	1	0	0	0	0	0	0	0	0	0	0	0	1	0	0	0	0	1	0	punish 2:1
221111_0933	Leipzig	4	Punisher	-5	-5	0	8	Loss	32	2022026	2022		weiblich	Deutschland	1	Ja	etwa im Durchschnitt	Ja	Online	0	0	0		0.5	0	0	0	0	0	1	0	0	0	0	0	0	0	0	0	1	1	1	0	0	0	0	1	0	punish 2:1
211206_1557	Leipzig	5	Punisher	-3.5	-6.5	0	3	Loss	26	2021889	2021		weiblich	Deutschland	1		etwa im Durchschnitt	Ja	Online	0	0	0		0.5	0	0	0	0	0	1	0	0	0	0	0	0	0	0	0	0	1	0	0	0	0	0	1	0	punish 2:1
211206_1557	Leipzig	1	Punisher	-5	-5	0	7	Loss	19	2021845	2021		weiblich	Deutschland	1	Ja	etwa im Durchschnitt	Nein	Online	0	0	0		0.5	0	0	0	0	0	1	0	0	0	0	0	0	0	0	0	0	1	0	0	0	0	0	1	0	punish 2:1
211202_1330	Leipzig	10	Dictator	-5	-5	-6	1	Loss	33	2021838	2021	50	weiblich	Deutschland	1	Ja	unter dem Durchschnitt	Nein	Online	0	1			0.5	0	0	0	0	1	1	1	0	0	0	0	0	0	0	0	1	1	1	0	0	0	0	1	0	punish 2:1
211130_0938	Magdeburg	4	Dictator	0	-10	-1	2	Loss		2021812	2021	100							Online	0	1			0.5	0	0	0	0	1	1	1	0	0	0	0	0	0	0	0	0	1	0	0	0	0	0	1	0	punish 2:1
210906_1649	Leipzig	2	Dictator	-5		-5	2	Loss	33	2021508	2021	50	weiblich	Deutschland	1		ueber dem Durchschnitt	Nein	Online	0	0		5	0.5	0	0	0	0	0	1	0	0	0	0	0	0	0	0	0	0	1	0	0	0	0	0	1		punish 2:1
210906_1649	Leipzig	7	Punisher	0	-10	0	1	Loss	32	2021529	2021		männlich	Deutschland	1	Ja	keine Angabe	Ja	Online	0	0	0	0	0.5	0	0	0	0	0	1	0	0	0	0	0	0	0	0	0	0	1	0	0	0	0	0	1		punish 2:1
211130_0938	Magdeburg	3	Punisher	0	-10	-2	2	Loss		2021811	2021								Online	0	1	1		0.5	0	0	0	0	0	0	0	0	0	0	0	0	0	0	0	0	1	0	0	0	0	0	1	0	punish 2:1
211123_0930	Magdeburg	8	Punisher	5	5	10	6	Gain	24	2021608	2021		weiblich	Deutschland	1	Ja	ueber dem Durchschnitt	Ja	Online	0	0	0		0.5	0	0	0	0	0	1	0	0	0	0	0	0	0	0	0	0	1	0	0	0	0	0	1	0	punish 2:1
210906_1649	Leipzig	6	Dictator	-2		-2	4	Loss	29	2021510	2021	80	weiblich	Deutschland	1		unter dem Durchschnitt	Ja	Online	0	0		5	0.5	0	0	0	0	0	1	0	0	0	0	0	0	0	0	0	0	1	0	0	0	0	0	1		punish 2:1
211206_1557	Leipzig	11	Dictator	-5	-5	-5	1	Loss	26	2021869	2021	50	weiblich	Deutschland	1	Ja	ueber dem Durchschnitt	Ja	Online	0	0			0.5	0	0	0	0	0	1	0	0	0	0	0	0	0	0	0	0	1	0	0	0	0	0	1	0	punish 2:1
210906_1649	Leipzig	3	Punisher	-5	-5	0	3	Loss	24	2021514	2021		weiblich	Deutschland	1	Ja	etwa im Durchschnitt	Nein	Online	0	0	0	0	0.5	0	0	0	0	0	1	0	0	0	0	0	0	0	0	0	0	1	0	0	0	0	0	1		punish 2:1
211202_1330	Leipzig	5	Dictator	-5	-5	-5	3	Loss	31	2021929	2021	50	männlich	Deutschland	1		weit unter dem Durchschnitt	Ja	Online	0	0			0.5	0	0	0	0	0	1	0	0	0	0	0	0	0	0	0	0	1	0	0	0	0	0	1	0	punish 2:1
211206_1557	Leipzig	2	Dictator	-5	-5	-5	5	Loss	42	2021905	2021	50	weiblich	Deutschland	1		unter dem Durchschnitt	Nein	Online	0	0			0.5	0	0	0	0	0	1	0	0	0	0	0	0	0	0	0	0	1	0	0	0	0	0	1	0	punish 2:1
221111_0933	Leipzig	9	Dictator	-1.5	-8.5	-1.5	3	Loss	20	2022045	2022	85	weiblich	Deutschland	1	Ja	unter dem Durchschnitt	Ja	Online	0	0			0.5	0	0	0	0	0	1	0	0	0	0	0	0	0	0	0	1	1	1	0	0	0	0	1	0	punish 2:1
210901_1545	Leipzig	10	Dictator	5		5	2	Gain	31	2021446	2021	50	weiblich	Deutschland	1	Ja	etwa im Durchschnitt	Ja	Online	0	0	0		0.5	0	0	0	0	0	1	0	0	0	0	0	0	0	0	0	0	1	0	0	0	0	0	1		punish 2:1
211202_1330	Leipzig	1	Dictator	-5	-5	-5	9	Loss	34	2021878	2021	50	männlich	Deutschland	1		ueber dem Durchschnitt	Ja	Online	0	0			0.5	0	0	0	0	0	1	0	0	0	0	0	0	0	0	0	0	1	0	0	0	0	0	1	1	punish 2:1
211124_1240	Magdeburg	9	Punisher	6	4	10	8	Gain	25	2021675	2021		weiblich	Deutschland	1	Ja	unter dem Durchschnitt	Nein	Online	0	0	0		0.5	0	0	0	0	0	1	0	0	0	0	0	0	0	0	0	1	1	1	0	0	0	0	1	0	punish 2:1
211202_1330	Leipzig	11	Dictator	-5	-5	-5	7	Loss	32	2021832	2021	50	weiblich	Deutschland	1		weit unter dem Durchschnitt	Ja	Online	0	0			0.5	0	0	0	0	0	1	0	0	0	0	0	1	1	1	1	1	1	0	0	0	0	0	1	0	punish 2:1
211202_1330	Leipzig	17	Punisher	-5	-5	0	3	Loss	25	2021871	2021		weiblich	Deutschland	1	Ja	ueber dem Durchschnitt	Nein	Online	0	0	0		0.5	0	0	0	0	0	1	0	0	0	0	0	0	0	0	0	0	1	0	0	0	0	0	1	0	punish 2:1
211202_1330	Leipzig	16	Punisher	-5	-5	0	7	Loss	32	2021914	2021		weiblich	Deutschland	1		ueber dem Durchschnitt	Ja	Online	0	0	0		0.5	0	0	0	0	0	1	0	0	0	0	0	0	0	0	0	0	1	0	0	0	0	0	1	0	punish 2:1
211207_0929	Leipzig	13	Punisher	10	0	10	5	Gain	43	2021707	2021		weiblich	Deutschland	1	Nein	etwa im Durchschnitt	Ja	Online	0	0	0		0.5	0	0	0	0	0	1	0	0	0	0	0	0	0	0	0	0	1	0	0	0	0	0	1	0	punish 2:1
211202_1330	Leipzig	9	Punisher	-5	-5	0	8	Loss	29	2021910	2021		weiblich	Deutschland	1		unter dem Durchschnitt	Ja	Online	0	0	0		0.5	0	0	0	0	0	1	0	0	0	0	0	0	0	0	0	0	1	0	0	0	0	0	1	0	punish 2:1
211123_0930	Magdeburg	18	Punisher	6.5	3.5	8	8	Gain	20	2021618	2021		männlich	Andere	0	Ja	ueber dem Durchschnitt	Nein	Online	0	1	1		0.5	0	0	0	0	0	1	0	0	0	0	0	0	0	0	0	0	0	1	0	0	0	0	1	0	punish 2:1
211206_1557	Leipzig	8	Dictator	-3.5	-6.5	-3.5	3	Loss	46	2021831	2021	65	weiblich	Deutschland	1		unter dem Durchschnitt	Ja	Online	0	0			0.5	0	0	0	0	0	1	0	0	0	0	0	0	0	0	0	0	1	0	0	0	0	0	1	0	punish 2:1
211207_0929	Leipzig	6	Dictator	6	4	6	1	Gain	37	2021700	2021	60	weiblich	Deutschland	1	Ja	etwa im Durchschnitt	Nein	Online	0	0	0		0.5	0	0	0	0	0	1	1	1	0	0	0	0	0	0	0	1	1	1	1	1	0	0	1	0	punish 2:1
221111_0933	Leipzig	14	Punisher	0	-10	0	6	Loss	32	2022036	2022		männlich	Deutschland	1		ueber dem Durchschnitt	Nein	Online	0	0	0		0.5	0	0	0	0	1	1	1	0	0	0	0	0	0	0	0	1	1	1	0	0	0	0	1	0	punish 2:1
221111_0933	Leipzig	3	Dictator	-5	-5	-5	5	Loss	25	2022037	2022	50	weiblich	Deutschland	1	Ja	unter dem Durchschnitt	Ja	Online	0	0			0.5	0	0	0	0	0	1	0	0	0	0	0	0	0	0	0	1	0	0	0	0	0	0	1	0	punish 2:1
210901_1545	Leipzig	7	Dictator	7.5		7.5	4	Gain	33	2021443	2021	75	keine Angabe	Deutschland	1	Ja	weit unter dem Durchschnitt	Ja	Online	0	0	0		0.5	0	0	0	0	0	0	0	1	0	0	0	0	0	0	0	0	0	0	1	0	0	0	1		punish 2:1
211206_1557	Leipzig	13	Punisher	-5	-5	0	4	Loss	27	2021836	2021		weiblich	Deutschland	1	Ja	etwa im Durchschnitt	Nein	Online	0	0	0		0.5	0	0	0	0	0	1	0	0	0	0	0	0	0	0	0	0	1	0	0	0	0	0	1	0	punish 2:1
211124_1240	Magdeburg	7	Punisher	10	0	10	5	Gain	21	2021673	2021		männlich	Deutschland	1	Ja	etwa im Durchschnitt	Nein	Online	0	0	0		0.5	1	1	1	1	1	1	1	1	1	1	1	0	0	0	1	1	1	1	1	0	0	0	1	0	punish 2:1
210901_1545	Leipzig	8	Punisher	7.5	2.5	5	4	Gain	29	2021444	2021		männlich	Deutschland	1	Ja	etwa im Durchschnitt	Ja	Online	0	0	0		0.5	0	0	0	0	0	1	0	0	0	0	0	0	0	0	0	0	1	0	0	0	0	0	1		punish 2:1
211202_1330	Leipzig	15	Punisher	0	-10	0	2	Loss	28	2021861	2021		weiblich	Deutschland	1		etwa im Durchschnitt	Ja	Online	0	0	0		0.5	0	0	0	0	0	1	0	0	0	0	0	0	0	0	0	0	1	0	0	0	0	0	1	0	punish 2:1
211207_0929	Leipzig	3	Dictator	5	5	5	2	Gain	35	2021697	2021	50	weiblich	Deutschland	1	Nein	unter dem Durchschnitt	Ja	Online	0	0	0		0.5	0	0	0	0	0	1	0	0	0	0	0	0	0	0	0	0	1	0	0	0	0	0	1	0	punish 2:1
211124_1240	Magdeburg	3	Punisher	10	0	8	3	Gain	21	2021669	2021		weiblich	Andere	0	Ja	etwa im Durchschnitt	Nein	Online	0	1	1		0.5	0	0	0	0	0	1	0	0	0	0	0	0	0	0	0	0	0	1	0	0	0	0	1	0	punish 2:1
210902_1543	Leipzig	2	Punisher	5	5	5	2	Gain	22	2021463	2021		männlich	Deutschland	1	Ja	ueber dem Durchschnitt	Ja	Online	0	0	0		0.5	0	0	0	0	0	1	0	0	0	0	0	0	0	0	0	0	1	0	0	0	0	0	1		punish 2:1
210902_1543	Leipzig	6	Punisher	10	0	5	3	Gain	25	2021467	2021		weiblich	Deutschland	1	Ja	unter dem Durchschnitt	Ja	Online	0	0	0		0.5	0	0	0	0	0	1	0	0	0	0	0	0	0	0	0	1	1	1	0	0	0	0	1		punish 2:1
211130_0938	Magdeburg	6	Dictator	-3	-7	-3	1	Loss		2021814	2021	70							Online	0	0			0.5	0	0	0	0	0	1	0	0	0	0	0	0	0	0	0	1	1	1	0	0	0	0	1	0	punish 2:1
211124_1240	Magdeburg	11	Dictator	5	5	5	7	Gain	24	2021677	2021	50	weiblich	Deutschland	1	Ja	ueber dem Durchschnitt	Ja	Online	0	0	0		0.5	0	0	0	0	0	1	0	0	0	0	0	0	0	0	0	0	0	0	1	0	0	0	1	0	punish 2:1
211123_0930	Magdeburg	15	Dictator	6.5	3.5	5.5	8	Gain	28	2021615	2021	65	männlich	Deutschland	1	Ja	ueber dem Durchschnitt	Ja	Online	0	1	0		0.5	1	1	1	1	1	1	1	1	0	0	0	0	0	0	0	1	1	1	0	0	0	0	1	0	punish 2:1
211123_0930	Magdeburg	11	Punisher	10	0	10	3	Gain	21	2021611	2021		weiblich	Deutschland	1	Ja	etwa im Durchschnitt	Nein	Online	0	0	0		0.5	0	0	0	0	0	1	0	0	0	0	0	0	0	0	0	0	1	1	0	0	0	1	1	0	punish 2:1
211123_0930	Magdeburg	6	Dictator	4	6	4	5	Gain	23	2021606	2021	40	männlich	Andere	0	Ja	etwa im Durchschnitt	Ja	Online	0	0	0		0.5	0	0	0	0	1	1	1	1	0	0	0	0	0	0	0	0	1	0	0	0	0	0	1	0	punish 2:1
211201_1242	Magdeburg	3	Dictator	-5	-5	-5	1	Loss	24	2021883	2021	50	weiblich	Deutschland	1	Ja	keine Angabe	Nein	Online	0	0			0.5	0	0	0	0	0	1	0	0	0	0	0	0	0	0	0	0	1	0	0	0	0	0	1	0	punish 2:1
211209_1338	Leipzig	8	Punisher	10	0	8	4	Gain	27	2021759	2021		weiblich	Deutschland	1	Ja	etwa im Durchschnitt	Nein	Online	0	1	1		0.5	0	0	0	0	1	1	1	0	0	0	0	0	0	0	0	1	1	1	0	0	0	0	1	0	punish 2:1
211123_0930	Magdeburg	1	Dictator	5	5	5	4	Gain	27	2021601	2021	50	weiblich	Andere	0	Ja	etwa im Durchschnitt	Ja	Online	0	0	0		0.5	0	0	0	0	0	1	0	0	0	0	0	0	0	0	0	0	1	0	0	0	0	0	1	0	punish 2:1
221111_0933	Leipzig	2	Dictator	-5	-5	-5	1	Loss	26	2022010	2022	50	weiblich	Deutschland	1		ueber dem Durchschnitt	Ja	Online	0	0			0.5	0	0	0	0	0	1	0	0	0	0	0	0	0	0	0	0	1	0	0	0	0	0	1	0	punish 2:1
211202_1330	Leipzig	14	Punisher	-5	-5	-2	1	Loss		2021801	2021		männlich	EU	0	Ja	keine Angabe	Nein	Online	0	1	1		0.5	0	0	1	0	0	0	0	0	0	0	0	0	0	1	0	0	0	0	0	0	0	0	1	0	punish 2:1
211207_0929	Leipzig	9	Punisher	5	5	10	3	Gain	27	2021703	2021		weiblich	Deutschland	1	Ja	etwa im Durchschnitt	Nein	Online	0	0	0		0.5	0	0	0	0	1	1	1	0	0	0	0	0	0	0	0	1	1	1	0	0	0	0	1	0	punish 2:1
210901_1545	Leipzig	2	Dictator	10		10	1	Gain	24	2021438	2021	100	keine Angabe	Deutschland	1	Ja	etwa im Durchschnitt	Ja	Online	0	0	0		0.5	0	0	0	0	0	1	0	0	0	0	0	0	0	0	0	0	1	0	0	0	0	0	1		punish 2:1
211202_1330	Leipzig	13	Punisher	0	-10	-2	4	Loss	43	2021932	2021		weiblich	Deutschland	1	Ja	unter dem Durchschnitt	Ja	Online	0	1	1		0.5	0	0	0	0	0	1	0	0	0	0	0	0	0	0	0	0	0	0	0	0	0	1	1	0	punish 2:1
211123_0930	Magdeburg	16	Dictator	5	5	5	1	Gain	26	2021616	2021	50	männlich	Deutschland	1	Ja	weit unter dem Durchschnitt	Ja	Online	0	0	0		0.5	0	0	0	0	0	1	0	0	0	0	0	0	0	0	0	0	1	0	0	0	0	0	1	0	punish 2:1
211209_1338	Leipzig	11	Punisher	10	0	8	2	Gain	24	2021762	2021		keine Angabe	Deutschland	1	Ja	ueber dem Durchschnitt	Ja	Online	0	1	1		0.5	0	0	0	0	0	1	0	0	0	0	0	0	0	0	0	0	1	0	0	0	0	0	1	0	punish 2:1
211207_0929	Leipzig	2	Dictator	10	0	10	5	Gain	33	2021696	2021	100	männlich	Deutschland	1	Ja	etwa im Durchschnitt	Ja	Online	0	0	0		0.5	0	0	0	0	0	1	0	0	0	0	0	0	0	0	0	0	1	0	0	0	0	0	1	0	punish 2:1
211209_1338	Leipzig	6	Punisher	5	5	10	5	Gain	33	2021757	2021		weiblich	Deutschland	1	Nein	etwa im Durchschnitt	Nein	Online	0	0	0		0.5	0	0	0	0	0	1	1	0	0	0	0	0	0	0	0	1	1	1	0	0	0	0	1	0	punish 2:1
211201_1242	Magdeburg	7	Punisher	-5	-5	0	3	Loss	27	2021896	2021		weiblich	Deutschland	1	Ja	unter dem Durchschnitt	Nein	Online	0	0	0		0.5	0	0	0	0	0	1	0	0	0	0	0	0	0	0	0	0	1	0	0	0	0	0	1	0	punish 2:1
211123_0930	Magdeburg	7	Punisher	4	6	10	5	Gain	25	2021607	2021		weiblich	Deutschland	1	Ja	unter dem Durchschnitt	Ja	Online	0	0	0		0.5	0	0	0	1	1	1	1	1	0	0	0	0	0	0	0	1	1	1	0	0	0	0	1	0	punish 2:1
211209_1338	Leipzig	10	Dictator	6	4	6	3	Gain	24	2021761	2021	60	weiblich	Deutschland	1	Ja	etwa im Durchschnitt	Ja	Online	0	0	0		0.5	0	0	0	0	1	1	1	0	0	0	0	0	0	0	0	1	1	1	0	0	0	0	1	0	punish 2:1
211202_1330	Leipzig	6	Dictator	-5	-5	-5	6	Loss	29	2021903	2021	50	männlich	Deutschland	1	Ja	unter dem Durchschnitt	Ja	Online	0	0			0.5	0	0	0	0	1	1	1	0	0	0	0	0	0	0	0	1	1	1	1	0	0	0	1	0	punish 2:1
210901_1545	Leipzig	9	Punisher	5	5	5	5	Gain	43	2021445	2021		männlich	Deutschland	1	Ja	unter dem Durchschnitt	Ja	Online	0	0	0		0.5	0	0	0	0	0	1	0	0	0	0	0	0	0	0	0	0	1	0	0	0	0	0	1		punish 2:1
211206_1557	Leipzig	6	Dictator	-4	-6	-4	2	Loss	31	2021891	2021	60	weiblich	Deutschland	1	Ja	ueber dem Durchschnitt	Ja	Online	0	0			0.5	0	0	0	0	0	1	0	0	0	0	0	0	0	0	0	1	1	1	0	0	0	0	1	0	punish 2:1
210902_1543	Leipzig	4	Dictator	10		10	3	Gain	29	2021465	2021	100	männlich	Deutschland	1	Nein	etwa im Durchschnitt	Nein	Online	0	0	0		0.5	0	0	0	0	0	1	0	0	0	0	0	0	0	0	0	0	0	1	0	0	0	0	1		punish 2:1
211206_1557	Leipzig	7	Punisher	-5	-5	0	5	Loss	30	2021830	2021		weiblich	Deutschland	1		etwa im Durchschnitt	Ja	Online	0	0	0		0.5	0	0	0	0	0	1	0	0	0	0	0	0	0	0	0	0	1	0	0	0	0	0	1	0	punish 2:1
211124_1240	Magdeburg	14	Dictator	5	5	5	1	Gain	21	2021680	2021	50	weiblich	Deutschland	1	Ja	etwa im Durchschnitt	Nein	Online	0	0	0		0.5	0	0	0	0	0	1	0	0	0	0	0	0	0	0	0	0	1	0	0	0	0	0	1	0	punish 2:1
210906_1649	Leipzig	8	Dictator	-5		-5	3	Loss		2021513	2021	50	.a					Nein	Online	0	0		5	0.5	0	0	0	0	0	1	0	0	0	0	0	0	0	0	0	0	1	0	0	0	0	0	1		punish 2:1
211209_1338	Leipzig	4	Punisher	6	4	10	3	Gain	34	2021755	2021		weiblich	Deutschland	1	Nein	ueber dem Durchschnitt	Nein	Online	0	0	0		0.5	0	0	0	0	0	1	1	1	0	0	0	0	0	0	0	1	1	1	0	0	0	0	1	0	punish 2:1
211124_1240	Magdeburg	6	Punisher	5	5	10	2	Gain	27	2021672	2021		männlich	Deutschland	1	Ja	ueber dem Durchschnitt	Ja	Online	0	0	0		0.5	1	1	1	1	1	1	0	0	0	0	0	1	1	1	1	1	1	0	0	0	0	0	1	0	punish 2:1
211209_1338	Leipzig	9	Dictator	5	5	5	5	Gain	28	2021760	2021	50	männlich	Deutschland	1	Nein	etwa im Durchschnitt	Ja	Online	0	0	0		0.5	0	0	0	0	0	1	0	0	0	0	0	0	0	0	0	0	1	1	0	0	0	0	1	0	punish 2:1
211202_1330	Leipzig	2	Dictator	0	-10	0	2	Loss	23	2021930	2021	100	männlich	Deutschland	1	Ja	etwa im Durchschnitt	Ja	Online	0	0			0.5	0	0	0	0	0	0	1	0	0	0	0	0	0	0	0	0	1	0	0	0	0	0	1	0	punish 2:1
210906_1649	Leipzig	5	Punisher	-2	-8	0	4	Loss	21	2021545	2021		weiblich	Deutschland	1	Ja	etwa im Durchschnitt	Nein	Online	0	0	0	0	0.5	0	0	0	0	0	1	0	0	0	0	0	0	0	0	0	0	0	0	1	0	0	0	1		punish 2:1
221111_0933	Leipzig	11	Dictator	0	-10	0	6	Loss	23	2022024	2022	100	weiblich	Deutschland	1	Ja	etwa im Durchschnitt	Ja	Online	0	0			0.5	0	0	0	0	0	1	0	0	0	0	0	0	0	0	0	0	1	0	0	0	0	0	1	0	punish 2:1
211209_1338	Leipzig	7	Punisher	5	5	10	6	Gain	22	2021758	2021		keine Angabe	Andere	0	Ja	ueber dem Durchschnitt	Ja	Online	0	0	0		0.5	0	0	1	1	1	1	1	1	1	0	0	0	0	0	1	1	1	1	1	0	0	0	1	0	punish 2:1
211209_1338	Leipzig	1	Dictator	8	2	7	1	Gain	21	2021752	2021	80	weiblich	Deutschland	1	Ja	etwa im Durchschnitt	Ja	Online	0	1	0		0.5	0	0	0	0	0	0	1	0	0	0	0	0	0	0	0	0	1	0	0	0	0	0	1	0	punish 2:1
211202_1330	Leipzig	12	Dictator		-5		5	Loss	65	2021865	2021		weiblich	Deutschland	1		etwa im Durchschnitt	Nein	Online	1				0.5	0	0	0	1	0	0	0	0	0	0	0	0	0	0	0	0	1	0	0	0	0	0	1	0	punish 2:1
211202_1330	Leipzig	3	Punisher	-5	-5	0	6	Loss	32	2021875	2021		männlich	Deutschland	1		etwa im Durchschnitt	Ja	Online	0	0	0		0.5	0	0	0	0	0	1	0	0	0	0	0	0	0	0	0	0	1	0	0	0	0	0	1	0	punish 2:1
211207_0929	Leipzig	1	Dictator	4	6	4	7	Gain	26	2021695	2021	40	weiblich	Deutschland	1	Nein	etwa im Durchschnitt	Ja	Online	0	0	0		0.5	0	0	0	0	0	1	0	0	0	0	0	0	0	0	0	0	1	0	0	0	0	0	1	1	punish 2:1
211207_0929	Leipzig	12	Dictator	5	5	5	3	Gain	26	2021706	2021	50	weiblich	Deutschland	1	Ja	weit unter dem Durchschnitt	Ja	Online	0	0	0		0.5	0	0	0	0	0	1	0	0	0	0	0	0	0	0	0	0	1	0	0	0	0	0	1	0	punish 2:1
210901_1545	Leipzig	5	Dictator	5		5	5	Gain	29	2021441	2021	50	weiblich	Deutschland	1	Nein	etwa im Durchschnitt	Ja	Online	0	0	0		0.5	0	0	0	0	0	1	0	0	0	0	0	0	0	0	0	0	1	0	0	0	0	0	1		punish 2:1
221111_0933	Leipzig	1	Punisher	-1.5	-8.5	0	3	Loss	24	2022052	2022		männlich	Deutschland	1	Ja	etwa im Durchschnitt	Ja	Online	0	0	0		0.5	0	0	0	0	0	1	0	0	0	0	0	0	0	0	0	0	1	0	0	0	0	0	1	0	punish 2:1
211207_0929	Leipzig	10	Dictator	10	0	10	6	Gain	32	2021704	2021	100	männlich	Deutschland	1	Nein	etwa im Durchschnitt	Ja	Online	0	0	0		0.5	0	0	0	0	0	1	0	0	0	0	0	0	0	0	0	1	1	1	0	0	0	0	1	0	punish 2:1
211209_1338	Leipzig	12	Punisher	8	2	8	1	Gain	26	2021763	2021		weiblich	Deutschland	1	Ja	weit unter dem Durchschnitt	Nein	Online	0	1	1		0.5	0	0	0	0	0	1	0	0	0	0	0	0	0	0	0	0	1	0	1	1	0	0	1	0	punish 2:1
211207_0929	Leipzig	8	Dictator	8	2	7	4	Gain	23	2021702	2021	80	männlich	Deutschland	1	Ja	etwa im Durchschnitt	Ja	Online	0	1	0		0.5	0	0	1	1	1	1	1	1	1	0	0	0	0	0	0	1	1	1	0	0	0	0	1	0	punish 2:1
211209_1338	Leipzig	5	Dictator	5	5	5	6	Gain	41	2021756	2021	50	weiblich	Deutschland	1	Ja	etwa im Durchschnitt	Ja	Online	0	0	0		0.5	0	0	0	0	0	1	0	0	0	0	0	0	0	0	0	0	1	0	0	0	0	0	1	0	punish 2:1
211206_1557	Leipzig	9	Dictator	-5	-5	-5	4	Loss	31	2021858	2021	50	weiblich	Deutschland	1	Ja	unter dem Durchschnitt	Ja	Online	0	0			0.5	0	0	0	0	0	1	0	0	0	0	0	0	0	0	1	0	0	0	0	0	0	0	1	0	punish 2:1
221111_0933	Leipzig	16	Punisher	-5	-5	0	7	Loss	27	2022020	2022		weiblich	Deutschland	1	Ja	etwa im Durchschnitt	Nein	Online	0	0	0		0.5	0	0	0	0	0	1	0	0	0	0	0	0	0	0	0	0	1	0	0	0	0	0	1	0	punish 2:1
211124_1240	Magdeburg	13	Dictator	9	1	9	4	Gain	21	2021679	2021	90	weiblich	Deutschland	1	Ja	unter dem Durchschnitt	Ja	Online	0	0	0		0.5	0	0	0	0	0	1	0	0	0	0	0	0	0	0	0	0	1	0	0	0	0	0	1	0	punish 2:1
211123_0930	Magdeburg	12	Dictator	10	0	10	3	Gain	23	2021612	2021	100	weiblich	Deutschland	1	Ja	ueber dem Durchschnitt	Nein	Online	0	0	0		0.5	0	0	0	0	0	1	1	1	1	0	0	0	0	0	0	0	1	1	0	0	0	0	1	0	punish 2:1
211123_0930	Magdeburg	14	Dictator	5	5	5	6	Gain	23	2021614	2021	50	weiblich	Deutschland	1	Ja	etwa im Durchschnitt	Ja	Online	0	0	0		0.5	0	0	0	0	0	1	0	0	0	0	0	0	0	0	0	0	1	0	0	0	0	0	1	0	punish 2:1
211207_0929	Leipzig	4	Punisher	8	2	8	4	Gain	22	2021698	2021		weiblich	Deutschland	1	Ja	unter dem Durchschnitt	Nein	Online	0	1	1		0.5	0	0	0	0	0	1	0	0	0	0	0	0	0	0	0	0	0	0	1	0	0	0	1	0	punish 2:1
211206_1557	Leipzig	14	Dictator	-5	-5	-5	7	Loss		2021808	2021	50	.a						Online	0	0			0.5	0	0	0	0	0	0	0	0	0	0	0	0	0	0	0	0	0	0	0	0	0	0	1	0	punish 2:1
210901_1545	Leipzig	1	Dictator	6		6	6	Gain	37	2021437	2021	60	weiblich	Deutschland	1	Nein	etwa im Durchschnitt	Ja	Online	0	0	0		0.5	0	0	0	0	0	1	0	0	0	0	0	0	0	0	0	0	0	1	0	0	0	0	1		punish 2:1
210902_1543	Leipzig	3	Punisher	8	2	5	4	Gain	22	2021464	2021		weiblich	Deutschland	1	Ja	etwa im Durchschnitt	Ja	Online	0	0	0		0.5	0	0	0	0	0	1	0	0	0	0	0	0	0	0	0	0	1	0	0	0	0	0	1		punish 2:1
211123_0930	Magdeburg	3	Punisher	7	3	10	2	Gain	32	2021603	2021		männlich	Deutschland	1	Ja	unter dem Durchschnitt	Ja	Online	0	0	0		0.5	0	0	0	1	1	1	1	1	0	0	0	0	0	0	0	1	1	1	0	0	0	0	1	0	punish 2:1
211124_1240	Magdeburg	5	Dictator	10	0	9	3	Gain	22	2021671	2021	100	weiblich	Deutschland	1	Ja	etwa im Durchschnitt	Ja	Online	0	1	0		0.5	0	0	0	0	1	1	1	0	0	0	0	0	0	0	0	0	1	0	0	0	0	0	1	0	punish 2:1
211202_1330	Leipzig	8	Dictator	0	-10	-1	4	Loss	23	2021874	2021	100	weiblich	Deutschland	1	Ja	etwa im Durchschnitt	Ja	Online	0	1			0.5	0	0	0	0	0	1	0	0	0	0	0	0	0	0	0	0	1	0	0	0	0	0	1	0	punish 2:1
210902_1543	Leipzig	8	Dictator	8		8	4	Gain		2021469	2021	80	weiblich	Deutschland	1	Ja	weit unter dem Durchschnitt	Nein	Online	0	0	0		0.5	0	0	0	0	1	0	0	0	0	0	0	0	0	0	0	0	0	0	0	1	0	0	1		punish 2:1
210906_1649	Leipzig	4	Dictator	0		0	1	Loss	33	2021538	2021	100	weiblich	Deutschland	1	Ja	unter dem Durchschnitt	Ja	Online	0	0		5	0.5	0	0	0	0	0	1	0	0	0	0	0	0	0	0	0	0	1	0	0	0	0	0	1		punish 2:1
210902_1543	Leipzig	1	Dictator	6		6	1	Gain	24	2021462	2021	60	weiblich	Deutschland	1	Nein	unter dem Durchschnitt	Nein	Online	0	0	0		0.5	0	0	0	0	1	1	1	0	0	0	0	0	0	0	0	1	1	1	0	0	0	0	1		punish 2:1
211209_1338	Leipzig	3	Dictator	10	0	9	4	Gain	31	2021754	2021	100	weiblich	Deutschland	1	Ja	unter dem Durchschnitt	Ja	Online	0	1	0		0.5	0	0	0	0	1	1	1	0	0	0	0	0	0	0	0	0	1	0	0	0	0	0	1	0	punish 2:1
210902_1543	Leipzig	5	Punisher	6	4	5	1	Gain	28	2021466	2021		weiblich	Deutschland	1	Ja	etwa im Durchschnitt	Nein	Online	0	0	0		0.5	0	0	0	0	1	1	1	0	0	0	0	0	0	0	0	1	1	1	0	0	0	0	1		punish 2:1
211123_0930	Magdeburg	4	Punisher	5	5	10	7	Gain	19	2021604	2021		weiblich	Deutschland	1	Ja	ueber dem Durchschnitt	Nein	Online	0	0	0		0.5	0	0	0	0	0	1	0	0	0	0	0	0	0	0	0	0	1	0	0	0	0	0	1	0	punish 2:1
210901_1545	Leipzig	4	Punisher	10	0	5	1	Gain	23	2021440	2021		weiblich	Deutschland	1	Ja	unter dem Durchschnitt	Nein	Online	0	0	0		0.5	0	0	0	0	0	1	0	0	0	0	0	0	0	0	0	0	1	0	0	0	0	0	1		punish 2:1
211123_0930	Magdeburg	13	Punisher	5	5	10	4	Gain	25	2021613	2021		männlich	Deutschland	1	Ja	etwa im Durchschnitt	Ja	Online	0	0	0		0.5	0	0	0	0	0	1	0	0	0	0	0	0	0	0	0	0	1	1	0	0	0	0	1	0	punish 2:1
211201_1242	Magdeburg	5	Dictator	-1	-9	-1	2	Loss	30	2021851	2021	90	männlich	Deutschland	1	Ja	ueber dem Durchschnitt	Ja	Online	0	0			0.5	0	1	1	1	1	1	1	1	1	1	0	0	0	0	1	1	1	1	1	0	0	0	1	0	punish 2:1
221111_0933	Leipzig	10	Dictator	-5	-5	-5	4	Loss	26	2022006	2022	50	männlich	Deutschland	1	Ja	ueber dem Durchschnitt	Nein	Online	0	0			0.5	0	0	0	0	1	1	1	0	0	0	0	0	0	0	0	1	1	1	0	0	0	0	1	0	punish 2:1
211123_0930	Magdeburg	5	Dictator	7	3	7	2	Gain	24	2021605	2021	70	weiblich	Deutschland	1	Ja	ueber dem Durchschnitt	Ja	Online	0	0	0		0.5	0	0	0	0	0	1	0	0	0	0	0	0	0	0	0	1	1	1	0	0	0	0	1	0	punish 2:1
210901_1545	Leipzig	3	Punisher	5	5	5	2	Gain	36	2021439	2021		weiblich	Deutschland	1	Nein	ueber dem Durchschnitt	Ja	Online	0	0	0		0.5	0	0	0	0	0	1	0	0	0	0	0	0	0	0	0	0	1	0	0	0	0	0	1		punish 2:1
210902_1543	Leipzig	7	Dictator	5		5	2	Gain	37	2021468	2021	50	weiblich	Andere	0	Ja	etwa im Durchschnitt	Ja	Online	0	0	0		0.5	0	0	0	0	0	1	0	0	0	0	0	0	0	0	0	0	0	1	0	0	0	0	1		punish 2:1
221111_0933	Leipzig	7	Punisher	-5	-5	0	4	Loss	20	2022044	2022		männlich	Deutschland	1	Ja	ueber dem Durchschnitt	Ja	Online	0	0	0		0.5	0	0	0	0	0	1	0	0	0	0	0	0	0	0	0	0	1	0	0	0	0	0	1	0	punish 2:1
210901_1545	Leipzig	11	Dictator	6		6	3	Gain	31	2021447	2021	60	männlich	Deutschland	1	Nein	unter dem Durchschnitt	Ja	Online	0	0	0		0.5	0	0	0	0	0	1	0	0	0	0	0	0	0	0	0	0	1	0	0	0	0	0	1		punish 2:1
211130_0938	Magdeburg	1	Punisher	-3	-7	0	1	Loss		2021809	2021								Online	0	0	0		0.5	0	0	0	0	0	1	0	0	0	0	0	0	0	0	0	0	1	0	0	0	0	0	1	0	punish 2:1
211201_1242	Magdeburg	2	Punisher	-1	-9	0	2	Loss	25	2021841	2021		männlich	Deutschland	1	Ja	unter dem Durchschnitt	Ja	Online	0	0	0		0.5	0	0	0	1	1	1	0	0	0	0	0	0	0	0	1	1	1	1	1	0	0	0	1	0	punish 2:1
211124_1240	Magdeburg	12	Punisher	5	5	10	1	Gain	25	2021678	2021		weiblich	Deutschland	1	Ja	etwa im Durchschnitt	Nein	Online	0	0	0		0.5	0	0	0	0	0	1	0	0	0	0	0	0	0	0	0	0	1	0	0	0	0	0	1	0	punish 2:1
211123_0930	Magdeburg	9	Dictator	5	5	5	7	Gain	23	2021609	2021	50	weiblich	Deutschland	1	Ja	unter dem Durchschnitt	Ja	Online	0	0	0		0.5	0	0	0	0	0	1	0	0	0	0	0	0	0	0	0	1	1	1	0	0	0	0	1	0	punish 2:1
221111_0933	Leipzig	6	Dictator	-5	-5	-5	7	Loss	21	2022005	2022	50	weiblich	Deutschland	1	Ja	ueber dem Durchschnitt		Online	0	0			0.5	0	0	0	0	0	1	0	0	0	0	0	0	0	0	0	0	1	0	0	0	0	0	1	0	punish 2:1
211207_0929	Leipzig	5	Punisher	6	4	10	1	Gain	33	2021699	2021		weiblich	Deutschland	1	Nein	etwa im Durchschnitt	Ja	Online	0	0	0		0.5	0	0	0	0	0	1	0	0	0	0	0	0	0	0	0	1	0	0	0	0	0	0	1	0	punish 2:1
221111_0933	Leipzig	13	Dictator	-5	-5	-5	8	Loss	28	2022035	2022	50	männlich	Deutschland	1	Ja	etwa im Durchschnitt	Nein	Online	0	0			0.5	0	0	0	0	0	1	0	0	0	0	0	0	0	0	0	0	1	0	0	0	0	0	1	0	punish 2:1
211123_0930	Magdeburg	17	Punisher	5	5	10	1	Gain	31	2021617	2021		weiblich	Deutschland	1	Ja	etwa im Durchschnitt	Ja	Online	0	0	0		0.5	0	0	0	0	0	1	1	1	1	1	0	0	0	0	0	0	1	1	1	1	0	0	1	0	punish 2:1
211124_1240	Magdeburg	1	Punisher	9	1	10	4	Gain	21	2021667	2021		weiblich	Deutschland	1	Ja	etwa im Durchschnitt	Ja	Online	0	0	0		0.5	0	0	0	0	0	1	0	0	0	0	0	0	0	0	0	0	1	0	0	0	0	0	1	0	punish 2:1
210901_1545	Leipzig	6	Punisher	6	4	5	3	Gain	49	2021442	2021		weiblich	Deutschland	1	Nein	etwa im Durchschnitt	Nein	Online	0	0	0		0.5	0	0	0	0	0	1	0	0	0	0	0	0	0	0	0	0	1	0	0	0	0	0	1		punish 2:1
210906_1649	Leipzig	1	Punisher	-5	-5	0	2	Loss	27	2021523	2021		weiblich	Deutschland	1		unter dem Durchschnitt	Ja	Online	0	0	0	0	0.5	0	0	0	0	1	1	1	0	0	0	0	0	0	0	0	1	1	1	0	0	0	0	1		punish 2:1
211124_1240	Magdeburg	10	Punisher	9	1	10	6	Gain	20	2021676	2021		männlich	Deutschland	1	Ja	ueber dem Durchschnitt	Ja	Online	0	0	0		0.5	0	0	0	0	0	1	0	0	0	0	0	0	0	0	0	0	1	0	0	0	0	0	1	0	punish 2:1
211206_1557	Leipzig	3	Dictator	0	-10	-1	6	Loss	21	2021848	2021	100	weiblich	Deutschland	1	Ja	unter dem Durchschnitt	Ja	Online	0	1			0.5	0	0	0	0	0	1	0	0	0	0	0	0	0	0	0	0	1	0	0	0	0	0	1	0	punish 2:1
211123_0930	Magdeburg	10	Punisher	10	0	10	9	Gain	24	2021610	2021		weiblich	Deutschland	1	Ja	etwa im Durchschnitt	Ja	Online	0	0	0		0.5	0	0	0	1	1	1	1	0	0	0	0	0	0	0	0	0	0	1	1	1	0	0	1	0	punish 2:1
211207_0929	Leipzig	11	Punisher	10	0	10	6	Gain	26	2021705	2021		männlich	Andere	0	Nein	ueber dem Durchschnitt	Ja	Online	0	0	0		0.5	0	0	0	0	0	1	0	0	0	0	0	0	0	0	0	0	1	0	0	0	0	0	1	0	punish 2:1
211206_1557	Leipzig	10	Punisher	0	-10	-2	6	Loss	45	2021868	2021		männlich	Deutschland	1		etwa im Durchschnitt	Ja	Online	0	1	1		0.5	0	0	0	0	0	1	0	0	0	0	0	0	0	0	0	0	1	0	0	0	0	0	1	0	punish 2:1
211207_1526	Leipzig	9	Punisher	10	0	8	3	Gain	24	2021716	2021		weiblich	Deutschland	1	Ja	ueber dem Durchschnitt	Ja	Online	0	1	1		1	0	0	0	0	0	1	0	0	0	0	0	0	0	0	0	0	1	0	0	0	0	0	1	0	punish 1:1
221111_1636	Leipzig	7	Punisher	-6	-4	0	6	Loss	23	2022048	2022		männlich	Deutschland	1	Ja	ueber dem Durchschnitt	Ja	Online	0	0	0		1	0	0	0	0	0	1	0	0	0	0	0	0	0	0	0	0	1	0	0	0	0	0	1	0	punish 1:1
210906_0945	Leipzig	9	Dictator	-5		-5	7	Loss	35	2021551	2021	50	weiblich	Deutschland	1		unter dem Durchschnitt	Ja	Online	0	0		5	1	0	0	0	0	0	1	0	0	0	0	0	0	0	0	0	0	1	0	0	0	0	0	1		punish 1:1
221111_1636	Leipzig	8	Dictator	-5	-5	-5	5	Loss	26	2022012	2022	50	keine Angabe	Deutschland	1	Ja	keine Angabe	Nein	Online	0	0			1	1	1	1	1	1	1	0	0	0	0	0	0	0	0	0	0	0	1	1	1	1	1	1	0	punish 1:1
210825_1443	Leipzig	9	Dictator	9.5		7.5	2	Gain	27	2021409	2021	95	weiblich	Deutschland	1	Ja	etwa im Durchschnitt	Ja	Online	0	1	0		1	0	0	0	0	0	1	0	0	0	0	0	0	0	0	0	0	1	0	0	0	0	0	1		punish 1:1
211124_1438	Magdeburg	4	Dictator	6.5	3.5	6.5	2	Gain	22	2021686	2021	65	männlich	Deutschland	1	Ja	ueber dem Durchschnitt	Ja	Online	0	0	0		1	0	0	0	0	0	1	0	0	0	0	0	0	0	0	0	0	1	0	0	0	0	0	1	0	punish 1:1
210902_0948	Leipzig	1	Punisher	5	5	5	3	Gain	30	2021448	2021		weiblich	Deutschland	1	Nein	etwa im Durchschnitt	Ja	Online	0	0	0		1	0	0	0	0	0	1	1	0	0	0	0	0	0	0	0	0	1	0	0	0	0	0	1		punish 1:1
210906_0945	Leipzig	13	Dictator	-5		-5	1	Loss	28	2021503	2021	50	weiblich	Deutschland	1	Ja	unter dem Durchschnitt	Ja	Online	0	0		5	1	0	0	0	0	0	1	0	0	0	0	0	0	0	0	0	0	1	1	0	0	0	0	1		punish 1:1
211201_1439	Magdeburg	5	Dictator	-5	-5	-5	2	Loss	26	2021826	2021	50	weiblich	Deutschland	1	Ja	etwa im Durchschnitt	Nein	Online	0	0			1	0	0	0	0	0	1	0	0	0	0	0	0	0	0	0	0	1	0	0	0	0	0	1	0	punish 1:1
211206_0937	Leipzig	3	Dictator	-5	-5	-5	3	Loss	22	2021888	2021	50	weiblich	Deutschland	1	Ja	etwa im Durchschnitt	Nein	Online	0	0			1	0	0	0	0	0	1	0	0	0	0	0	0	0	0	0	0	1	0	0	0	0	0	1	0	punish 1:1
211130_1240	Magdeburg	8	Punisher	-5	-5	0	4	Loss	20	2021817	2021		männlich	Deutschland	1	Ja	etwa im Durchschnitt	Nein	Online	0	0	0		1	0	0	0	0	0	1	1	1	1	1	1	0	0	0	0	0	1	0	0	0	0	1	1	0	punish 1:1
211206_0937	Leipzig	15	Punisher	0	-10	0	2	Loss	23	2021824	2021		weiblich	Deutschland	1	Ja	etwa im Durchschnitt	Nein	Online	0	0	0		1	0	0	0	0	0	1	0	0	0	0	0	0	0	0	0	0	1	0	0	0	0	0	1	0	punish 1:1
211206_0937	Leipzig	17	Dictator	-8	-2	-8	5	Loss		2021807	2021	20	weiblich	Deutschland	1	Ja	ueber dem Durchschnitt	Ja	Online	0	0			1	0	0	0	0	1	1	1	0	0	0	0	1	0	0	0	1	1	1	0	0	0	0	1	0	punish 1:1
221111_1636	Leipzig	11	Dictator	-5	-5	-5	7	Loss	26	2022050	2022	50	keine Angabe	Deutschland	1	Ja	etwa im Durchschnitt	Nein	Online	0	0			1	0	0	0	0	1	1	1	0	0	0	0	0	0	0	0	0	1	0	0	0	0	0	1	0	punish 1:1
211202_1538	Leipzig	11	Punisher	-3	-7	-2	7	Loss		2021803	2021		weiblich	Deutschland	1	Ja	ueber dem Durchschnitt	Ja	Online	0	1	1		1	0	0	0	0	0	1	0	0	0	0	0	0	0	0	0	0	1	0	0	0	0	0	1	0	punish 1:1
211123_1241	Magdeburg	2	Punisher	5	5	10	8	Gain	24	2021620	2021		weiblich	Deutschland	1	Ja	ueber dem Durchschnitt	Ja	Online	0	0	0		1	0	0	0	0	0	1	0	0	0	0	0	0	0	0	0	0	1	0	0	0	0	0	1	0	punish 1:1
211202_1538	Leipzig	3	Dictator	-3.5	-6.5	-3.5	1	Loss	30	2021852	2021	65	weiblich	Deutschland	1	Ja	etwa im Durchschnitt	Nein	Online	0	0			1	0	0	0	0	0	1	0	0	0	0	0	0	0	0	0	0	1	0	0	0	0	0	1	0	punish 1:1
210906_0945	Leipzig	11	Punisher	-5	-5	0	4	Loss	24	2021506	2021		weiblich	Deutschland	1	Ja	ueber dem Durchschnitt	Ja	Online	0	0	0	0	1	0	0	0	0	0	1	0	0	0	0	0	0	0	0	0	0	0	1	0	0	0	0	1		punish 1:1
211123_1241	Magdeburg	6	Dictator	7.5	2.5	7.5	6	Gain	22	2021624	2021	75	weiblich	Deutschland	1	Ja	unter dem Durchschnitt	Ja	Online	0	0	0		1	0	0	0	0	0	1	1	1	0	0	0	0	0	0	0	0	1	1	1	1	1	0	1	0	punish 1:1
210906_1355	Leipzig	2	Dictator	-5		-7	3	Loss	23	2021520	2021	50	männlich	Deutschland	1	Ja	unter dem Durchschnitt	Ja	Online	0	1		5	1	0	0	0	0	0	1	1	0	0	0	0	0	0	0	0	0	1	0	0	0	0	0	1		punish 1:1
210906_1355	Leipzig	1	Punisher	-4	-6	0	2	Loss	25	2021512	2021		weiblich	Deutschland	1	Ja	ueber dem Durchschnitt	Ja	Online	0	0	0	0	1	0	0	0	0	1	1	1	0	0	0	0	0	0	0	0	1	1	1	0	0	0	0	1		punish 1:1
211209_1543	Leipzig	4	Dictator	6	4	6	6	Gain	30	2021767	2021	60	weiblich	Deutschland	1	Nein	etwa im Durchschnitt	Ja	Online	0	0	0		1	0	0	0	0	0	1	1	1	1	0	0	0	0	0	0	0	1	1	0	0	0	0	1	0	punish 1:1
211209_1543	Leipzig	8	Punisher	10	0	8	4	Gain	33	2021771	2021		weiblich	Deutschland	1	Nein	unter dem Durchschnitt	Ja	Online	0	1	1		1	0	0	0	0	1	1	1	0	0	0	0	0	0	0	0	0	1	0	0	0	0	0	1	0	punish 1:1
211124_1438	Magdeburg	9	Dictator	5	5	5	3	Gain	25	2021691	2021	50	weiblich	Deutschland	1	Ja	etwa im Durchschnitt	Nein	Online	0	0	0		1	0	0	0	0	0	1	0	0	0	0	0	0	0	0	0	0	0	1	0	0	0	0	1	0	punish 1:1
210825_1443	Leipzig	5	Punisher	7.5	2.5	3	4	Gain	24	2021405	2021		weiblich	Deutschland	1	Nein	unter dem Durchschnitt	Ja	Online	0	1	1		1	0	0	0	0	0	1	0	0	0	0	0	0	0	0	0	0	1	0	0	0	0	0	1		punish 1:1
211201_1439	Magdeburg	2	Punisher	-5	-5	0	1	Loss	23	2021911	2021		männlich	Deutschland	1	Ja	etwa im Durchschnitt	Ja	Online	0	0	0		1	0	0	0	0	0	1	0	0	0	0	0	0	0	0	0	0	1	0	0	0	0	0	1	0	punish 1:1
210825_1443	Leipzig	10	Punisher	5	5	5	3	Gain	34	2021410	2021		weiblich	Deutschland	1	Nein	etwa im Durchschnitt	Ja	Online	0	0	0		1	0	0	0	0	0	1	0	0	0	0	0	0	0	0	0	0	1	0	0	0	0	0	1		punish 1:1
211207_1526	Leipzig	15	Punisher	7	3	10	5	Gain	30	2021722	2021		weiblich	Deutschland	1	Nein	etwa im Durchschnitt	Nein	Online	0	0	0		1	0	0	0	0	0	1	0	0	0	0	0	0	0	0	0	0	0	1	0	0	0	0	1	0	punish 1:1
210906_0945	Leipzig	4	Punisher	-5	-5	0	7	Loss	27	2021531	2021		weiblich	Deutschland	1	Ja	etwa im Durchschnitt	Ja	Online	0	0	0	0	1	0	0	0	0	1	1	1	1	1	1	1	0	0	0	0	1	1	0	0	0	0	0	1		punish 1:1
211207_1526	Leipzig	5	Dictator	10	0	8	3	Gain		2021712	2021	100							Online	0	1	0		1	0	0	0	0	0	1	0	0	0	0	0	0	0	0	0	0	1	0	0	0	0	0	1	0	punish 1:1
211124_1438	Magdeburg	12	Dictator	6	4	4	1	Gain	25	2021694	2021	60	weiblich	Deutschland	1	Ja	etwa im Durchschnitt	Ja	Online	0	1	0		1	0	0	0	0	0	0	0	1	0	0	0	0	0	0	0	0	0	1	0	0	0	0	1	0	punish 1:1
210906_0945	Leipzig	5	Punisher	-5	-5	0	3	Loss	26	2021542	2021		männlich	Deutschland	1	Ja	unter dem Durchschnitt	Ja	Online	0	0	0	0	1	0	0	0	0	1	1	1	0	0	0	0	0	0	0	0	1	1	1	0	0	0	0	1		punish 1:1
211123_1241	Magdeburg	16	Punisher	5	5	10	1	Gain	28	2021634	2021		männlich	Deutschland	1	Ja	unter dem Durchschnitt	Nein	Online	0	0	0		1	0	0	0	0	0	1	0	0	0	0	0	0	0	0	0	0	1	0	0	0	0	0	1	0	punish 1:1
211202_1538	Leipzig	13	Dictator	-2	-8	-4	6	Loss	24	2021902	2021	80	männlich	Deutschland	1		unter dem Durchschnitt	Ja	Online	0	1			1	0	0	0	0	0	1	0	0	0	0	0	0	0	0	0	1	1	0	0	0	0	0	1	0	punish 1:1
211209_1543	Leipzig	3	Punisher	6	4	10	6	Gain	35	2021766	2021		männlich	Deutschland	1	Ja	unter dem Durchschnitt	Nein	Online	0	0	0		1	0	0	0	0	1	1	1	0	0	0	0	0	0	0	1	1	1	1	1	0	0	0	1	0	punish 1:1
211206_0937	Leipzig	2	Dictator	-0.5	-9.5	-2.5	4	Loss	28	2021897	2021	95	weiblich	EU	0	Ja	etwa im Durchschnitt	Ja	Online	0	1			1	0	0	0	0	1	1	1	0	0	0	0	0	0	0	0	0	1	0	0	0	0	0	1	0	punish 1:1
221111_1636	Leipzig	10	Dictator	-2	-8	-2	8	Loss	19	2022041	2022	80	weiblich	Deutschland	1	Ja	etwa im Durchschnitt	Nein	Online	0	0			1	0	0	0	0	0	1	0	0	0	0	0	0	0	0	0	0	1	0	0	0	0	0	1	0	punish 1:1
211206_0937	Leipzig	1	Punisher	-0.5	-9.5	-2	4	Loss	26	2021927	2021		weiblich	Deutschland	1	Ja	etwa im Durchschnitt	Ja	Online	0	1	1		1	0	0	0	0	0	1	0	0	0	0	0	0	0	0	0	0	1	0	0	0	0	0	1	0	punish 1:1
210906_1355	Leipzig	5	Dictator	-4		-4	2	Loss	22	2021533	2021	60	männlich	Deutschland	1	Ja	etwa im Durchschnitt	Ja	Online	0	0		5	1	0	0	0	0	0	0	1	0	0	0	0	0	0	0	0	0	0	1	0	0	0	0	1		punish 1:1
211206_0937	Leipzig	5	Punisher	0	-10	0	1	Loss	37	2021882	2021		weiblich	Deutschland	1	Ja	ueber dem Durchschnitt	Ja	Online	0	0	0		1	0	0	0	0	1	1	1	0	0	0	0	0	0	0	0	1	1	1	0	0	0	0	1	0	punish 1:1
211206_0937	Leipzig	9	Punisher	-5	-5	0	6	Loss	27	2021872	2021		weiblich	Deutschland	1	Ja	ueber dem Durchschnitt	Ja	Online	0	0	0		1	0	0	0	0	0	1	0	0	0	0	0	0	0	0	0	0	1	0	0	0	0	0	1	0	punish 1:1
211207_1526	Leipzig	10	Punisher	5	5	10	4	Gain	34	2021717	2021		männlich	Deutschland	1	Nein	unter dem Durchschnitt	Nein	Online	0	0	0		1	0	0	0	0	0	1	0	0	0	0	0	0	0	0	0	0	1	0	0	0	0	0	1	0	punish 1:1
211206_0937	Leipzig	14	Dictator	-5	-5	-5	6	Loss	26	2021854	2021	50	weiblich	Deutschland	1	Ja	etwa im Durchschnitt	Ja	Online	0	0			1	0	0	0	0	0	1	0	0	0	0	0	0	0	0	0	0	1	0	0	0	0	0	1	0	punish 1:1
211130_1240	Magdeburg	4	Punisher	-5	-5	0	5	Loss	21	2021921	2021		männlich	Andere	0	Ja	unter dem Durchschnitt	Nein	Online	0	0	0		1	0	0	0	0	0	1	0	0	0	0	0	0	0	0	0	0	1	0	0	0	0	0	1	0	punish 1:1
211207_1526	Leipzig	6	Dictator	7	3	7	5	Gain	22	2021713	2021	70	männlich	Deutschland	1	Ja	etwa im Durchschnitt	Ja	Online	0	0	0		1	0	0	0	0	0	1	1	0	0	0	0	0	0	0	0	0	0	0	0	0	0	0	1	0	punish 1:1
210825_1443	Leipzig	14	Dictator	5		5	5	Gain	25	2021414	2021	50	männlich	Deutschland	1	Ja	etwa im Durchschnitt	Nein	Online	0	0	0		1	0	0	0	0	0	1	0	0	0	0	0	0	0	0	0	0	1	0	0	0	0	0	1		punish 1:1
211207_1526	Leipzig	17	Dictator	5	5	5	1	Gain	30	2021724	2021	50	weiblich	EU	0	Ja	unter dem Durchschnitt	Ja	Online	0	0	0		1	0	0	0	0	0	1	0	0	0	0	0	0	0	0	0	0	1	0	0	0	0	0	1	0	punish 1:1
211202_1538	Leipzig	7	Punisher	0	-10	0	5	Loss	31	2021828	2021		weiblich	Deutschland	1		etwa im Durchschnitt	Ja	Online	0	0	0		1	0	0	0	0	0	1	0	0	0	0	0	0	0	0	0	0	1	0	0	0	0	0	1	0	punish 1:1
210902_0948	Leipzig	2	Dictator	5		5	1	Gain	27	2021449	2021	50	männlich	Deutschland	1	Ja	etwa im Durchschnitt		Online	0	0	0		1	0	0	0	0	0	1	0	0	0	0	0	0	0	0	0	0	1	0	0	0	0	0	1		punish 1:1
211130_1240	Magdeburg	12	Punisher	-5	-5	-2	2	Loss	18	2021867	2021		männlich	Deutschland	1	Ja	ueber dem Durchschnitt	Ja	Online	0	1	1		1	1	1	1	1	1	1	0	0	0	0	0	0	0	0	0	0	1	0	0	0	0	0	1	0	punish 1:1
211209_1543	Leipzig	9	Punisher	6	4	10	2	Gain	23	2021772	2021		weiblich	Deutschland	1	Ja	ueber dem Durchschnitt	Ja	Online	0	0	0		1	0	0	0	0	1	1	1	0	0	0	0	0	0	0	0	1	1	1	0	0	0	0	1	0	punish 1:1
211207_1526	Leipzig	4	Dictator	4.5	5.5	4.5	7	Gain	29	2021711	2021	45	weiblich	EU	0	Ja	weit unter dem Durchschnitt	Ja	Online	0	0	0		1	0	0	0	1	1	1	0	0	0	0	0	0	0	0	0	1	1	1	0	0	0	0	1	0	punish 1:1
211206_0937	Leipzig	12	Dictator	-5	-5	-5	8	Loss	22	2021917	2021	50	weiblich	Deutschland	1	Ja	ueber dem Durchschnitt	Nein	Online	0	0			1	0	0	0	0	0	1	0	0	0	0	0	0	0	0	0	0	1	0	0	0	0	0	1	0	punish 1:1
211202_1538	Leipzig	12	Dictator	0	-10	-2	4	Loss	37	2021850	2021	100	weiblich	Deutschland	1		ueber dem Durchschnitt	Ja	Online	0	1			1	0	0	0	0	0	1	0	0	0	0	0	0	0	0	0	0	1	0	0	0	0	0	1	0	punish 1:1
211207_1526	Leipzig	3	Punisher	5	5	10	6	Gain	30	2021710	2021		männlich	Deutschland	1	Nein	etwa im Durchschnitt	Ja	Online	0	0	0		1	0	0	0	0	0	1	0	0	0	0	0	0	0	0	0	0	1	0	0	0	0	0	1	0	punish 1:1
221111_1636	Leipzig	2	Punisher	0	-10	0	2	Loss	33	2022025	2022		weiblich	Deutschland	1		ueber dem Durchschnitt	Ja	Online	0	0	0		1	0	0	0	0	0	1	0	0	0	0	0	0	0	0	0	0	1	0	0	0	0	0	1	0	punish 1:1
210906_1355	Leipzig	4	Dictator	0		0	1	Loss	27	2021518	2021	100	weiblich	Deutschland	1	Ja	unter dem Durchschnitt	Nein	Online	0	0		5	1	0	0	0	0	0	1	0	0	0	0	0	0	0	0	0	0	1	0	0	0	0	0	1		punish 1:1
221111_1636	Leipzig	13	Dictator	-5	-5	-5	1	Loss	21	2022039	2022	50	weiblich	Deutschland	1	Ja	etwa im Durchschnitt	Ja	Online	0	0			1	0	0	0	0	1	1	1	0	0	0	0	0	0	0	0	0	1	0	0	0	0	0	1	0	punish 1:1
211206_0937	Leipzig	4	Punisher	-5	-5	0	8	Loss	25	2021829	2021		weiblich	Deutschland	1	Ja	ueber dem Durchschnitt	Ja	Online	0	0	0		1	0	0	0	0	1	1	1	0	0	0	0	0	0	0	0	0	1	0	0	0	0	0	1	0	punish 1:1
210902_0948	Leipzig	14	Dictator	5		5	2	Gain		2021461	2021	50						Ja	Online	0	0	0		1	0	0	0	0	0	0	0	0	0	0	0	0	0	0	0	0	1	0	0	0	0	0	1		punish 1:1
210902_0948	Leipzig	13	Punisher	5.5	4.5	5	4	Gain	28	2021460	2021		männlich	Deutschland	1	Ja	weit unter dem Durchschnitt	Ja	Online	0	0	0		1	0	0	0	0	0	1	0	0	0	0	0	0	0	0	0	0	1	0	0	0	0	0	1		punish 1:1
211207_1526	Leipzig	14	Dictator	5	5	5	4	Gain	31	2021721	2021	50	weiblich	Deutschland	1	Nein	unter dem Durchschnitt	Ja	Online	0	0	0		1	0	0	0	0	0	1	0	0	0	0	0	0	0	0	0	0	0	1	0	0	0	0	1	0	punish 1:1
211209_1543	Leipzig	6	Punisher	7.5	2.5	10	3	Gain	31	2021769	2021		männlich	Deutschland	1	Nein	unter dem Durchschnitt	Ja	Online	0	0	0		1	0	0	0	0	0	1	1	0	0	0	0	0	0	0	0	1	1	1	1	0	0	0	1	0	punish 1:1
210825_1443	Leipzig	6	Punisher	5	5	5	5	Gain	33	2021406	2021		weiblich	Deutschland	1	Ja	unter dem Durchschnitt	Nein	Online	0	0	0		1	0	0	0	0	0	1	0	0	0	0	0	0	0	0	0	0	1	0	0	0	0	0	1		punish 1:1
211207_1526	Leipzig	8	Punisher	7	3	10	8	Gain	24	2021715	2021		weiblich	Deutschland	1	Ja	unter dem Durchschnitt	Ja	Online	0	0	0		1	0	0	0	0	0	0	1	0	0	0	0	0	0	0	0	0	1	0	0	0	0	0	1	0	punish 1:1
211206_0937	Leipzig	13	Punisher	-5	-5	0	3	Loss	26	2021863	2021		weiblich	Deutschland	1		etwa im Durchschnitt	Ja	Online	0	0	0		1	0	0	0	0	0	1	0	0	0	0	0	0	0	0	0	0	1	0	0	0	0	0	1	0	punish 1:1
210906_0945	Leipzig	14	Dictator	-5		-5	3	Loss	21	2021517	2021	50	keine Angabe	Deutschland	1	Ja	keine Angabe	Ja	Online	0	0		5	1	1	1	1	1	1	1	0	0	0	0	0	0	0	0	0	0	1	0	0	0	0	0	1		punish 1:1
211207_1526	Leipzig	13	Punisher	4.5	5.5	10	7	Gain		2021720	2021								Online	2		0		1	0	0	0	0	0	0	0	0	0	0	0	0	0	0	0	0	0	0	0	0	0	0	1	0	punish 1:1
211130_1240	Magdeburg	6	Dictator	-5	-5	-5	3	Loss	32	2021853	2021	50	männlich	Deutschland	1	Ja	etwa im Durchschnitt	Ja	Online	0	0			1	0	0	0	0	0	1	0	0	0	0	0	0	0	0	0	0	1	0	0	0	0	0	1	0	punish 1:1
211130_1240	Magdeburg	5	Punisher	-5	-5	0	3	Loss	25	2021815	2021		männlich	Andere	0	Ja	etwa im Durchschnitt	Nein	Online	0	0	0		1	0	0	0	0	0	1	0	0	0	0	0	0	0	0	0	0	1	0	0	0	0	0	1	0	punish 1:1
210825_1443	Leipzig	3	Punisher	6	4	5	1	Gain		2021403	2021							Ja	Online	0	0	0		1	0	0	0	0	0	1	0	0	0	0	0	0	0	0	0	0	0	1	0	0	0	0	1		punish 1:1
211202_1538	Leipzig	14	Punisher	-2	-8	-2	6	Loss	22	2021899	2021		weiblich	Deutschland	1	Ja	ueber dem Durchschnitt	Nein	Online	0	1	1		1	0	0	0	0	1	1	1	0	0	0	0	0	0	0	1	1	1	1	1	0	0	0	1	0	punish 1:1
210902_0948	Leipzig	10	Punisher	5	5	5	2	Gain	23	2021457	2021		weiblich	Andere	0	Ja	unter dem Durchschnitt	Ja	Online	0	0	0		1	0	0	0	0	0	1	0	0	0	0	0	0	0	0	0	0	1	0	0	0	0	0	1		punish 1:1
211202_1538	Leipzig	2	Punisher	0	-10	-2	4	Loss	36	2021928	2021		weiblich	Deutschland	1		unter dem Durchschnitt	Ja	Online	0	1	1		1	0	0	1	0	0	1	0	0	0	0	0	0	0	0	0	0	1	0	0	0	0	0	1	0	punish 1:1
211124_1438	Magdeburg	6	Punisher	5	5	10	3	Gain	25	2021688	2021		weiblich	Deutschland	1	Ja	etwa im Durchschnitt	Ja	Online	0	0	0		1	0	0	0	0	0	1	0	0	0	0	0	0	0	0	0	0	1	0	0	0	0	0	1	0	punish 1:1
211124_1438	Magdeburg	8	Dictator	10	0	8	5	Gain	22	2021690	2021	100	weiblich	Deutschland	1	Ja	ueber dem Durchschnitt	Ja	Online	0	1	0		1	0	0	0	0	0	1	0	0	0	0	0	0	0	0	0	0	1	0	0	0	0	0	1	0	punish 1:1
221111_1636	Leipzig	17	Punisher	-5	-5	0	5	Loss	21	2022038	2022		weiblich	Deutschland	1	Ja	ueber dem Durchschnitt	Ja	Online	0	0	0		1	0	0	0	0	0	1	0	0	0	0	0	0	0	0	0	0	1	0	0	0	0	0	1	0	punish 1:1
221111_1636	Leipzig	9	Dictator	0	-10	0	2	Loss	25	2022049	2022	100	keine Angabe	Deutschland	1	Ja	unter dem Durchschnitt	Ja	Online	0	0			1	0	0	0	0	0	1	0	0	0	0	0	0	0	0	0	0	1	0	0	0	0	0	1	0	punish 1:1
221111_1636	Leipzig	6	Dictator	-5	-5	-5	4	Loss	27	2022032	2022	50	weiblich	Deutschland	1	Ja	etwa im Durchschnitt	Nein	Online	0	0			1	0	0	0	0	0	1	0	0	0	0	0	0	0	0	0	0	1	0	0	0	0	0	1	0	punish 1:1
210906_1355	Leipzig	6	Punisher	-5	-5	-2	3	Loss	27	2021552	2021		männlich	Deutschland	1	Ja	ueber dem Durchschnitt	Nein	Online	0	1	1	0	1	0	0	0	0	0	1	0	0	0	0	0	0	0	0	0	0	1	0	0	0	0	0	1		punish 1:1
221111_1636	Leipzig	14	Punisher	-5	-5	0	7	Loss	20	2022003	2022		weiblich	Deutschland	1	Ja	ueber dem Durchschnitt	Ja	Online	0	0	0		1	0	0	0	0	1	1	1	0	0	0	0	0	0	0	0	0	1	0	0	0	0	0	1	0	punish 1:1
211202_1538	Leipzig	5	Dictator	-3	-7	-5	7	Loss	25	2021919	2021	70	weiblich	Deutschland	1		etwa im Durchschnitt		Online	0	1			1	0	0	0	0	0	1	0	0	0	0	0	0	0	0	0	0	1	0	0	0	0	0	1	0	punish 1:1
211202_1538	Leipzig	4	Punisher	-5	-5	0	2	Loss	25	2021827	2021		weiblich	Deutschland	1		etwa im Durchschnitt	Nein	Online	0	0	0		1	0	0	0	0	0	1	0	0	0	0	0	0	0	0	0	0	1	0	0	0	0	0	1	0	punish 1:1
210825_1443	Leipzig	12	Dictator	6		6	1	Gain	84	2021412	2021	60	männlich	Deutschland	1	Ja	etwa im Durchschnitt	Ja	Online	0	0	0		1	0	0	0	0	1	1	1	0	0	0	0	0	0	0	0	1	1	1	0	0	0	0	1		punish 1:1
210825_1443	Leipzig	13	Punisher	9.5	0.5	3	2	Gain	31	2021413	2021		weiblich	Deutschland	1	Nein	unter dem Durchschnitt	Ja	Online	0	1	1		1	0	0	0	0	0	1	0	0	0	0	0	0	0	0	0	0	1	0	0	0	0	0	1		punish 1:1
210906_0945	Leipzig	12	Dictator	-4		-4	6	Loss		2021550	2021	60	weiblich	Deutschland	1	Ja	ueber dem Durchschnitt	Nein	Online	0	0		5	1	0	0	0	0	0	1	0	0	0	0	0	0	0	0	0	0	1	0	0	0	0	0	1		punish 1:1
211123_1241	Magdeburg	5	Punisher	8.5	1.5	10	3	Gain	25	2021623	2021		männlich	Deutschland	1	Ja	ueber dem Durchschnitt	Ja	Online	0	0	0		1	0	0	0	0	1	1	1	0	0	0	0	0	0	0	0	0	1	0	0	0	0	0	1	0	punish 1:1
211123_1241	Magdeburg	8	Dictator	5	5	5	1	Gain	18	2021626	2021	50	weiblich	Deutschland	1	Ja	ueber dem Durchschnitt	Nein	Online	0	0	0		1	0	0	0	0	0	1	1	0	0	0	0	0	0	0	0	0	1	1	1	0	0	0	1	0	punish 1:1
211201_1439	Magdeburg	4	Punisher	-5	-5	0	2	Loss	19	2021859	2021		männlich	Deutschland	1	Ja	etwa im Durchschnitt	Nein	Online	0	0	0		1	0	0	0	0	0	1	0	0	0	0	0	0	0	0	0	0	1	0	0	0	0	0	1	0	punish 1:1
211123_1241	Magdeburg	15	Punisher	10	0	8	4	Gain	22	2021633	2021		weiblich	Deutschland	1	Ja	ueber dem Durchschnitt	Nein	Online	0	1	1		1	0	0	0	0	1	1	1	0	0	0	0	0	0	0	0	1	1	1	0	0	0	0	1	0	punish 1:1
221111_1636	Leipzig	4	Punisher	-5	-5	0	4	Loss	28	2022014	2022		männlich	Deutschland	1	Ja	etwa im Durchschnitt	Ja	Online	0	0	0		1	0	0	0	0	0	1	0	0	0	0	0	0	0	0	0	0	1	0	0	0	0	0	1	0	punish 1:1
211130_1240	Magdeburg	3	Dictator	-5.5	-4.5	-5.5	1	Loss	21	2021892	2021	45	männlich	Deutschland	1	Ja	weit ueber dem Durchschnitt	Ja	Online	0	0			1	0	0	0	0	0	1	0	0	0	0	0	0	0	0	0	0	1	0	0	0	0	0	1	0	punish 1:1
211209_1543	Leipzig	5	Dictator	6	4	6	2	Gain	28	2021768	2021	60	männlich	Deutschland	1	Nein	etwa im Durchschnitt	Ja	Online	0	0	0		1	0	0	0	0	0	1	0	0	0	0	0	0	0	0	0	0	1	0	0	0	0	0	1	0	punish 1:1
211206_0937	Leipzig	6	Punisher	-10	0	0	7	Loss	28	2021894	2021		männlich	Deutschland	1	Ja	ueber dem Durchschnitt	Ja	Online	0	0	0		1	0	0	0	0	0	1	1	0	0	0	0	0	0	0	0	0	1	0	0	0	0	0	1	0	punish 1:1
211209_1543	Leipzig	11	Dictator	5	5	5	1	Gain	27	2021774	2021	50	weiblich	Deutschland	1	Ja	weit unter dem Durchschnitt	Ja	Online	0	0	0		1	0	0	0	0	0	1	0	0	0	0	0	0	0	0	0	0	1	0	0	0	0	0	1	0	punish 1:1
211202_1538	Leipzig	9	Punisher	-4.5	-5.5	0	3	Loss	28	2021880	2021		weiblich	Deutschland	1		etwa im Durchschnitt	Ja	Online	0	0	0		1	0	0	0	0	0	1	0	0	0	0	0	0	0	0	0	0	1	0	0	0	0	0	1	0	punish 1:1
211130_1240	Magdeburg	1	Punisher	-5.5	-4.5	0	1	Loss	30	2021833	2021		weiblich	Deutschland	1	Ja	ueber dem Durchschnitt	Ja	Online	0	0	0		1	0	0	0	0	0	1	0	0	0	0	0	0	0	0	0	0	1	0	0	0	0	0	1	0	punish 1:1
221111_1636	Leipzig	3	Dictator	-6	-4	-6	6	Loss	31	2022015	2022	40	weiblich	Deutschland	1	Ja	etwa im Durchschnitt	Nein	Online	0	0			1	0	0	0	0	0	1	0	0	0	0	0	0	0	0	0	0	1	0	0	0	0	0	1	0	punish 1:1
211123_1241	Magdeburg	13	Dictator	7	3	7	7	Gain	24	2021631	2021	70	weiblich	Deutschland	1	Ja	unter dem Durchschnitt	Ja	Online	0	0	0		1	0	0	0	0	0	1	0	0	0	0	0	0	0	0	0	0	1	0	0	0	0	0	1	0	punish 1:1
210825_1443	Leipzig	2	Dictator	5		5	6	Gain	33	2021402	2021	50	männlich	Deutschland	1	Nein	etwa im Durchschnitt	Ja	Online	0	0	0		1	0	0	0	0	0	1	0	0	0	0	0	0	0	0	0	0	1	0	0	0	0	0	1		punish 1:1
210906_0945	Leipzig	7	Dictator	0		-2	5	Loss	25	2021541	2021	100	weiblich	Deutschland	1	Ja	unter dem Durchschnitt	Ja	Online	0	1		5	1	0	0	0	0	0	1	0	0	0	0	0	0	0	0	0	0	1	0	0	0	0	0	1		punish 1:1
210825_1443	Leipzig	1	Dictator	5		5	8	Gain	25	2021401	2021	50	männlich	Deutschland	1	Ja	etwa im Durchschnitt	Ja	Online	0	0	0		1	0	0	0	0	0	1	0	0	0	0	0	0	0	0	0	0	1	0	0	0	0	0	1		punish 1:1
210906_0945	Leipzig	3	Punisher	-5	-5	0	2	Loss	27	2021511	2021		männlich	Deutschland	1	Ja	etwa im Durchschnitt	Ja	Online	0	0	0	0	1	0	0	0	0	0	1	1	0	0	0	0	0	0	0	0	0	1	1	0	0	0	0	1		punish 1:1
210906_0945	Leipzig	10	Punisher	-5	-5	0	1	Loss	30	2021515	2021		weiblich	Deutschland	1		unter dem Durchschnitt	Ja	Online	0	0	0	0	1	0	0	0	0	0	1	0	0	0	0	0	0	0	0	0	0	1	0	0	0	0	0	1		punish 1:1
211206_0937	Leipzig	11	Dictator	0	-10	0	2	Loss	27	2021926	2021	100	keine Angabe	Deutschland	1	Ja	weit unter dem Durchschnitt	Nein	Online	0	0			1	0	0	0	0	0	1	0	0	0	0	0	0	0	0	0	0	1	0	0	0	0	0	1	0	punish 1:1
210825_1443	Leipzig	4	Dictator	5		5	3	Gain	57	2021404	2021	50	weiblich	Deutschland	1	Nein	etwa im Durchschnitt	Ja	Online	0	0	0		1	0	0	0	0	1	1	1	0	0	0	0	0	0	0	0	1	1	1	0	0	0	0	1		punish 1:1
211130_1240	Magdeburg	2	Dictator	-5	-5	-5	4	Loss	22	2021866	2021	50	weiblich	Deutschland	1	Ja	unter dem Durchschnitt	Ja	Online	0	0			1	1	1	1	1	1	1	0	0	0	0	0	0	0	0	0	0	1	0	0	0	0	0	1	0	punish 1:1
211130_1240	Magdeburg	11	Dictator	-5	-5	-5	5	Loss	23	2021923	2021	50	weiblich	Deutschland	1	Ja	unter dem Durchschnitt	Ja	Online	0	0			1	0	0	0	0	0	1	0	0	0	0	0	0	0	0	0	0	1	0	0	0	0	0	1	0	punish 1:1
211206_0937	Leipzig	7	Dictator	-10	0	-10	7	Loss	26	2021912	2021	0	männlich	Deutschland	1	Ja	etwa im Durchschnitt	Ja	Online	0	0			1	0	0	0	0	0	1	0	0	0	0	0	0	0	0	0	1	1	1	0	0	0	0	1	0	punish 1:1
221111_1636	Leipzig	12	Dictator	0	-10	-2	3	Loss	36	2022007	2022	100	männlich	Deutschland	1		ueber dem Durchschnitt	Ja	Online	0	1			1	0	0	0	0	0	0	0	1	0	0	0	0	0	0	0	0	1	0	0	0	0	0	1	0	punish 1:1
211202_1538	Leipzig	6	Dictator	-5	-5	-5	2	Loss	36	2021922	2021	50	männlich	Deutschland	1		etwa im Durchschnitt	Nein	Online	0	0			1	0	0	0	0	0	1	0	0	0	0	0	0	0	0	0	0	1	0	0	0	0	0	1	0	punish 1:1
210902_0948	Leipzig	12	Dictator	4		4	5	Gain	23	2021459	2021	40	weiblich	Deutschland	1	Ja	etwa im Durchschnitt	Ja	Online	0	0	0		1	0	0	0	0	1	0	0	0	0	0	0	0	0	0	0	0	1	0	0	0	0	0	1		punish 1:1
211123_1241	Magdeburg	9	Dictator	10	0	10	5	Gain	22	2021627	2021	100	weiblich	Deutschland	1	Ja	etwa im Durchschnitt	Ja	Online	0	0	0		1	0	0	0	0	1	1	1	0	0	0	0	0	0	0	0	0	1	0	0	0	0	0	1	0	punish 1:1
221111_1636	Leipzig	15	Punisher	-5	-5	0	1	Loss	21	2022022	2022		männlich	Deutschland	1	Ja	weit unter dem Durchschnitt	Ja	Online	0	0	0		1	0	0	0	0	0	1	0	0	0	0	0	0	0	0	0	0	1	0	0	0	0	0	1	0	punish 1:1
211207_1526	Leipzig	7	Dictator	6	4	6	2	Gain	33	2021714	2021	60	weiblich	Deutschland	1	Nein	ueber dem Durchschnitt	Nein	Online	0	0	0		1	0	0	0	0	1	1	1	0	0	0	0	0	0	0	0	1	1	1	0	0	0	0	1	0	punish 1:1
210906_0945	Leipzig	6	Dictator	-5		-5	4	Loss	31	2021534	2021	50	weiblich	Deutschland	1		ueber dem Durchschnitt	Ja	Online	0	0		5	1	0	0	0	0	0	1	0	0	0	0	0	0	0	0	0	0	1	0	0	0	0	0	1		punish 1:1
210906_0945	Leipzig	8	Dictator	-5		-5	2	Loss	34	2021540	2021	50	weiblich	Deutschland	1	Ja	unter dem Durchschnitt	Ja	Online	0	0		5	1	0	0	0	0	0	1	0	0	0	0	0	0	0	0	0	0	1	0	0	0	0	0	1		punish 1:1
211209_1543	Leipzig	2	Punisher	5	5	10	1	Gain	24	2021765	2021		weiblich	Deutschland	1	Ja	ueber dem Durchschnitt	Ja	Online	0	0	0		1	0	0	0	0	0	1	0	0	0	0	0	0	0	0	0	1	1	1	0	0	0	0	1	0	punish 1:1
210902_0948	Leipzig	4	Dictator	5		5	3	Gain	24	2021451	2021	50	weiblich	Deutschland	1	Ja	ueber dem Durchschnitt	Nein	Online	0	0	0		1	0	0	0	0	0	1	0	0	0	0	0	0	0	0	0	0	1	0	0	0	0	0	1		punish 1:1
211124_1438	Magdeburg	10	Punisher	6.5	3.5	10	2	Gain	22	2021692	2021		männlich	Deutschland	1	Ja	ueber dem Durchschnitt	Ja	Online	0	0	0		1	0	0	0	0	0	1	0	0	0	0	0	0	0	0	0	0	1	0	0	0	0	0	1	0	punish 1:1
211202_1538	Leipzig	8	Dictator	-4.5	-5.5	-4.5	3	Loss	31	2021840	2021	55	weiblich	Deutschland	1	Ja	etwa im Durchschnitt	Nein	Online	0	0			1	0	0	0	0	0	1	0	0	0	0	0	0	0	0	0	0	1	0	0	0	0	0	1	0	punish 1:1
211123_1241	Magdeburg	10	Dictator	5	5	5	8	Gain	27	2021628	2021	50	männlich	Deutschland	1	Ja	etwa im Durchschnitt	Ja	Online	0	0	0		1	0	0	0	0	0	1	0	0	0	0	0	0	0	0	0	0	1	0	0	0	0	0	1	0	punish 1:1
211209_1543	Leipzig	7	Dictator	5	5	5	5	Gain	31	2021770	2021	50	männlich	Deutschland	1	Ja	unter dem Durchschnitt	Nein	Online	0	0	0		1	0	0	0	0	0	1	0	0	0	0	0	0	0	0	0	0	1	0	0	0	0	0	1	0	punish 1:1
211201_1439	Magdeburg	6	Punisher	-5	-5	0	3	Loss	20	2021925	2021		männlich	Deutschland	1	Ja	ueber dem Durchschnitt	Ja	Online	0	0	0		1	0	0	0	0	0	1	0	0	0	0	0	0	0	0	0	0	1	0	0	0	0	0	1	0	punish 1:1
211207_1526	Leipzig	2	Punisher	6	4	10	2	Gain	33	2021709	2021		männlich	Deutschland	1	Ja	weit unter dem Durchschnitt	Ja	Online	0	0	0		1	0	0	0	0	0	0	1	0	0	0	0	0	0	0	0	0	1	0	0	0	0	0	1	0	punish 1:1
211124_1438	Magdeburg	3	Dictator	10	0	10	4	Gain	24	2021685	2021	100	männlich	Deutschland	1	Ja	etwa im Durchschnitt	Ja	Online	0	0	0		1	0	0	0	0	0	1	1	1	0	0	0	0	0	0	0	1	1	1	1	0	0	0	1	0	punish 1:1
211206_0937	Leipzig	18	Punisher	-8	-2	0	5	Loss	27	2021864	2021		weiblich	Deutschland	1	Ja	ueber dem Durchschnitt	Ja	Online	0	0	0		1	0	0	0	0	1	1	1	0	0	0	0	0	0	0	0	1	1	1	0	0	0	0	1	0	punish 1:1
210825_1443	Leipzig	11	Punisher	5	5		7	Gain	24	2021411	2021		weiblich	Deutschland	1	Ja	ueber dem Durchschnitt	Ja	Online	1		0		1	0	0	0	0	1	1	1	1	0	0	0	0	0	0	0	1	1	1	0	0	0	0	1		punish 1:1
210902_0948	Leipzig	3	Dictator	5.5		5.5	4	Gain		2021450	2021	55						Ja	Online	0	0	0		1	0	0	0	0	0	1	0	0	0	0	0	0	0	0	0	0	1	0	0	0	0	0	1		punish 1:1
210902_0948	Leipzig	7	Dictator	7		7	7	Gain	26	2021454	2021	70	weiblich	Deutschland	1	Ja	unter dem Durchschnitt	Ja	Online	0	0	0		1	0	0	0	0	0	1	0	0	0	0	0	0	0	0	0	0	0	1	0	0	0	0	1		punish 1:1
211130_1240	Magdeburg	7	Punisher	-5	-5	0	6	Loss	19	2021816	2021		männlich	Deutschland	1	Ja	ueber dem Durchschnitt	Ja	Online	0	0	0		1	1	0	0	0	0	1	0	0	0	0	0	1	0	0	0	0	0	0	0	0	0	0	1	0	punish 1:1
221111_1636	Leipzig	1	Dictator	-5	-5	-5	9	Loss	27	2022051	2022	50	weiblich	Deutschland	1		ueber dem Durchschnitt	Ja	Online	0	0			1	0	0	0	0	0	1	0	0	0	0	0	0	0	0	0	0	1	0	0	0	0	0	1	1	punish 1:1
211209_1543	Leipzig	1	Punisher	5	5	10	5	Gain	26	2021764	2021		weiblich	Deutschland	1	Ja	etwa im Durchschnitt	Nein	Online	0	0	0		1	0	0	0	0	0	1	0	0	0	0	0	0	0	0	0	0	1	0	0	0	0	0	1	0	punish 1:1
210906_0945	Leipzig	1	Punisher	-4	-6	0	6	Loss	26	2021528	2021		weiblich	Deutschland	1	Ja	etwa im Durchschnitt	Ja	Online	0	0	0	0	1	0	0	0	0	0	1	0	0	0	0	0	1	1	1	1	1	1	0	0	0	0	0	1		punish 1:1
211207_1526	Leipzig	11	Dictator	5	5	5	6	Gain	25	2021718	2021	50	weiblich	Deutschland	1	Ja	etwa im Durchschnitt	Nein	Online	0	0	0		1	0	0	0	0	0	1	0	0	0	0	0	0	0	0	0	0	1	0	0	0	0	0	1	0	punish 1:1
211206_0937	Leipzig	8	Dictator	-5	-5	-5	9	Loss	22	2021906	2021	50	männlich	Deutschland	1	Ja	ueber dem Durchschnitt	Nein	Online	0	0			1	0	0	0	0	0	1	0	0	0	0	0	0	0	0	0	0	1	0	0	0	0	0	1	0	punish 1:1
221111_1636	Leipzig	5	Punisher	0	-10	-2	3	Loss	20	2022040	2022		weiblich	Deutschland	1	Ja	ueber dem Durchschnitt	Nein	Online	0	1	1		1	0	0	0	0	1	1	1	0	0	0	0	0	0	0	0	1	1	1	0	0	0	0	1	0	punish 1:1
211207_1526	Leipzig	1	Dictator	5	5	5	9	Gain	32	2021708	2021	50	männlich	Deutschland	1	Ja	etwa im Durchschnitt	Nein	Online	0	0	0		1	0	0	0	0	0	1	0	0	0	0	0	0	0	0	0	1	1	0	0	0	0	0	1	1	punish 1:1
210902_0948	Leipzig	9	Punisher	7	3	5	7	Gain	30	2021456	2021		weiblich	Deutschland	1	Nein	etwa im Durchschnitt	Nein	Online	0	0	0		1	0	0	0	0	0	1	0	0	0	0	0	0	0	0	0	0	1	0	0	0	0	0	1		punish 1:1
211201_1439	Magdeburg	3	Dictator	-5	-5	-5	1	Loss	29	2021857	2021	50	männlich	Deutschland	1	Ja	etwa im Durchschnitt	Ja	Online	0	0			1	0	0	0	0	0	1	0	0	0	0	0	0	0	0	0	0	1	0	0	0	0	0	1	0	punish 1:1
211130_1240	Magdeburg	10	Dictator	-5	-5	-7	2	Loss	24	2021839	2021	50	weiblich	Deutschland	1	Ja	weit ueber dem Durchschnitt	Ja	Online	0	1			1	0	0	0	0	0	1	0	0	0	0	0	0	0	0	0	0	1	0	0	0	0	0	1	0	punish 1:1
210906_1355	Leipzig	3	Punisher	0	-10	0	1	Loss	24	2021548	2021		weiblich	Deutschland	1	Ja	ueber dem Durchschnitt	Ja	Online	0	0	0	0	1	0	0	0	0	0	1	0	0	0	0	0	0	0	0	0	0	1	0	0	0	0	0	1		punish 1:1
211124_1438	Magdeburg	7	Dictator	5	5	5	6	Gain	28	2021689	2021	50	männlich	Deutschland	1	Ja	etwa im Durchschnitt	Ja	Online	0	0	0		1	0	0	0	0	1	1	1	0	0	0	0	0	0	0	1	1	1	1	1	0	0	0	1	0	punish 1:1
211123_1241	Magdeburg	7	Punisher	10	0	10	5	Gain	28	2021625	2021		weiblich	Deutschland	1	Ja	unter dem Durchschnitt	Ja	Online	0	0	0		1	0	0	0	0	0	1	0	0	0	0	0	0	0	0	0	0	1	0	0	0	0	0	1	0	punish 1:1
210902_0948	Leipzig	11	Punisher	5	5	5	1	Gain	33	2021458	2021		weiblich	Deutschland	1	Ja	ueber dem Durchschnitt	Ja	Online	0	0	0		1	0	0	0	0	0	1	0	0	0	0	0	0	0	0	0	0	1	0	0	0	0	0	1		punish 1:1
211123_1241	Magdeburg	4	Dictator	10	0	8	2	Gain	25	2021622	2021	100	männlich	Deutschland	1	Ja	ueber dem Durchschnitt	Ja	Online	0	1	0		1	0	0	0	0	0	1	0	0	0	0	0	0	0	0	0	0	1	0	0	0	0	0	1	0	punish 1:1
211123_1241	Magdeburg	3	Punisher	7.5	2.5	10	6	Gain	26	2021621	2021		weiblich	Deutschland	1	Ja	ueber dem Durchschnitt	Ja	Online	0	0	0		1	0	0	0	0	0	0	0	1	0	0	0	0	0	0	0	0	0	1	0	0	0	0	1	0	punish 1:1
210902_0948	Leipzig	8	Punisher	4	6	5	5	Gain	24	2021455	2021		weiblich	Deutschland	1	Ja	etwa im Durchschnitt	Nein	Online	0	0	0		1	0	0	0	0	1	1	1	0	0	0	0	0	0	0	0	1	1	0	0	0	0	0	1		punish 1:1
211206_0937	Leipzig	10	Punisher	-5	-5	0	9	Loss	26	2021806	2021		männlich	Deutschland	1	Ja	etwa im Durchschnitt	Ja	Online	0	0	0		1	0	0	0	0	1	1	1	0	0	0	0	0	0	0	0	1	1	1	0	0	0	0	1	0	punish 1:1
211202_1538	Leipzig	1	Punisher	-3.5	-6.5	0	1	Loss	27	2021873	2021		weiblich	Deutschland	1	Ja	etwa im Durchschnitt	Nein	Online	0	0	0		1	0	0	0	0	0	1	0	0	0	0	0	0	0	0	0	0	1	0	0	0	0	0	1	0	punish 1:1
211207_1526	Leipzig	12	Punisher	5	5	10	1	Gain	42	2021719	2021		weiblich	Deutschland	1	Nein	unter dem Durchschnitt	Nein	Online	0	0	0		1	0	0	0	0	0	1	0	0	0	0	0	0	0	0	0	0	1	0	0	0	0	0	1	0	punish 1:1
211207_1526	Leipzig	16	Dictator	7	3	7	8	Gain	29	2021723	2021	70	männlich	Deutschland	1	Nein	ueber dem Durchschnitt	Ja	Online	0	0	0		1	0	0	0	1	1	1	1	1	0	0	0	0	0	0	0	1	1	1	0	0	0	0	1	0	punish 1:1
211130_1240	Magdeburg	9	Dictator	-5	-5	-5	6	Loss	24	2021920	2021	50	weiblich	Deutschland	1	Ja	ueber dem Durchschnitt	Ja	Online	0	0			1	0	0	0	0	0	1	0	0	0	0	0	0	0	0	0	0	1	0	0	0	0	0	1	0	punish 1:1
210825_1443	Leipzig	8	Punisher	5	5	5	6	Gain	26	2021408	2021		männlich	Deutschland	1	Nein	unter dem Durchschnitt	Ja	Online	0	0	0		1	0	0	0	0	0	1	0	0	0	0	0	0	0	0	0	0	1	0	0	0	0	0	1		punish 1:1
210902_0948	Leipzig	5	Dictator	10		8	6	Gain	28	2021452	2021	100	weiblich	Deutschland	1	Nein	etwa im Durchschnitt	Ja	Online	0	1	0		1	0	0	0	0	0	1	0	0	0	0	0	0	0	0	0	1	1	1	0	0	0	0	1		punish 1:1
211123_1241	Magdeburg	11	Dictator	8.5	1.5	8.5	3	Gain	29	2021629	2021	85	weiblich	Deutschland	1	Ja	unter dem Durchschnitt	Nein	Online	0	0	0		1	0	0	0	0	0	0	0	0	1	0	0	0	0	0	0	0	0	1	0	0	0	0	1	0	punish 1:1
211124_1438	Magdeburg	2	Punisher	10	0	10	4	Gain	22	2021684	2021		weiblich	Deutschland	1	Ja	weit ueber dem Durchschnitt	Ja	Online	0	0	0		1	0	0	0	1	0	0	0	0	0	0	0	0	0	0	0	0	1	0	0	0	0	0	1	0	punish 1:1
221111_1636	Leipzig	16	Punisher	-2	-8	0	8	Loss	19	2022021	2022		weiblich	Deutschland	1	Ja	ueber dem Durchschnitt	Ja	Online	0	0	0		1	1	1	1	1	1	1	0	0	0	0	0	1	1	1	1	1	1	0	0	0	0	0	1	0	punish 1:1
211124_1438	Magdeburg	5	Punisher	6	4	8	1	Gain	28	2021687	2021		männlich	Andere	0	Ja	etwa im Durchschnitt	Ja	Online	0	1	1		1	0	0	0	0	0	0	1	0	0	0	0	0	0	0	0	0	1	0	0	0	0	0	1	0	punish 1:1
210902_0948	Leipzig	6	Punisher	10	0	3	6	Gain	25	2021453	2021		männlich	Deutschland	1	Ja	etwa im Durchschnitt	Ja	Online	0	1	1		1	0	0	0	0	0	1	0	0	0	0	0	0	0	0	0	0	0	1	0	0	0	0	1		punish 1:1
211123_1241	Magdeburg	14	Punisher	7	3	10	7	Gain	25	2021632	2021		weiblich	Deutschland	1	Ja	etwa im Durchschnitt	Ja	Online	0	0	0		1	0	0	0	1	1	1	1	1	0	0	0	0	0	0	0	1	1	1	0	0	0	0	1	0	punish 1:1
210825_1443	Leipzig	7	Dictator	7.5		5.5	4	Gain	25	2021407	2021	75	weiblich	Deutschland	1	Nein	unter dem Durchschnitt	Nein	Online	0	1	0		1	0	0	0	0	0	1	0	0	0	0	0	0	0	0	0	0	1	0	0	0	0	0	1		punish 1:1
210906_0945	Leipzig	2	Punisher	0	-10	-2	5	Loss	23	2021501	2021		weiblich	Deutschland	1	Ja	ueber dem Durchschnitt	Nein	Online	0	1	1	0	1	0	0	0	0	0	1	0	0	0	0	0	0	0	0	0	0	1	0	0	0	0	0	1		punish 1:1
211201_1439	Magdeburg	1	Dictator	-5	-5	-5	3	Loss	23	2021890	2021	50	männlich	Deutschland	1	Ja	etwa im Durchschnitt	Ja	Online	0	0			1	0	0	0	0	1	1	1	0	0	0	0	0	0	0	0	0	1	0	0	0	0	0	1	0	punish 1:1
211123_1241	Magdeburg	1	Dictator	10	0	10	9	Gain	25	2021619	2021	100	männlich	Deutschland	1	Ja	weit unter dem Durchschnitt	Ja	Online	0	0	0		1	0	0	0	0	0	1	0	0	0	0	0	0	0	0	0	0	0	1	0	0	0	0	1	1	punish 1:1
211124_1438	Magdeburg	11	Punisher	10	0	8	5	Gain	25	2021693	2021		weiblich	Deutschland	1	Ja	ueber dem Durchschnitt	Ja	Online	0	1	1		1	0	0	0	0	0	1	0	0	0	0	0	0	0	0	0	0	1	0	0	0	0	1	1	0	punish 1:1
211206_0937	Leipzig	16	Dictator	0	-10	0	1	Loss	25	2021856	2021	100	weiblich	Deutschland	1	Ja	ueber dem Durchschnitt	Ja	Online	0	0			1	0	0	0	0	0	0	0	0	0	0	1	0	0	0	0	0	1	0	0	0	0	0	1	0	punish 1:1
211123_1241	Magdeburg	12	Dictator	10	0	8	4	Gain	21	2021630	2021	100	weiblich	Deutschland	1	Ja	unter dem Durchschnitt	Nein	Online	0	1	0		1	0	0	0	0	0	1	0	0	0	0	0	0	0	0	0	0	1	0	0	0	0	0	1	0	punish 1:1
211209_1543	Leipzig	12	Dictator	7.5	2.5	7.5	3	Gain	34	2021775	2021	75	weiblich	Deutschland	1	Nein	etwa im Durchschnitt	Ja	Online	0	0	0		1	0	0	0	0	0	1	1	0	0	0	0	0	0	0	0	1	1	1	0	0	0	0	1	0	punish 1:1
211123_1241	Magdeburg	17	Punisher	10	0	8	2	Gain	29	2021635	2021		männlich	Deutschland	1	Ja	unter dem Durchschnitt	Ja	Online	0	1	1		1	0	0	0	0	1	1	1	0	0	0	0	0	0	0	0	0	1	0	0	0	0	0	1	0	punish 1:1
211124_1438	Magdeburg	1	Punisher	5	5	10	6	Gain	22	2021683	2021		weiblich	Deutschland	1	Ja	etwa im Durchschnitt	Ja	Online	0	0	0		1	0	0	0	0	0	1	0	0	0	0	0	0	0	0	0	0	1	0	0	0	0	0	1	0	punish 1:1
211202_1538	Leipzig	10	Dictator	0	-10	0	5	Loss	26	2021802	2021	100	männlich	Andere	0	Ja	unter dem Durchschnitt	Nein	Online	0	0			1	0	0	0	0	0	1	0	0	0	0	0	0	0	0	0	0	1	0	0	0	0	0	1	0	punish 1:1
211209_1543	Leipzig	10	Dictator	10	0	8	4	Gain	27	2021773	2021	100	weiblich	Deutschland	1	Ja	ueber dem Durchschnitt	Ja	Online	0	1	0		1	0	0	0	0	0	1	1	0	0	0	0	0	0	0	0	0	1	0	0	0	0	0	1	0	punish 1:1
211208_0928	Leipzig	11	Punisher	6	4	10	7	Gain		2021735	2021								Online	2		0		3	0	0	0	0	0	0	0	0	0	0	0	0	0	0	0	0	0	0	0	0	0	0	1	0	punish 1:3
211208_0928	Leipzig	13	Punisher	5	5	10	3	Gain	29	2021737	2021		männlich	Deutschland	1	Ja	ueber dem Durchschnitt	Ja	Online	0	0	0		3	0	0	0	0	1	0	0	0	0	0	0	0	0	0	0	0	0	1	0	0	0	0	1	0	punish 1:3
211203_0934	Leipzig	7	Punisher	-4	-6	-2	5	Loss	25	2021876	2021		weiblich	Deutschland	1		etwa im Durchschnitt	Ja	Online	0	1	1		3	0	0	0	0	0	1	0	0	0	0	0	0	0	0	0	1	1	1	0	0	0	0	1	0	punish 1:3
211208_1531	Leipzig	9	Punisher	5	5	10	2	Gain	28	2021750	2021		männlich	Deutschland	1	Ja	weit ueber dem Durchschnitt	Ja	Online	0	0	0		3	0	0	0	0	0	1	1	0	0	0	0	0	0	0	0	0	1	0	0	0	0	0	1	0	punish 1:3
211201_0938	Magdeburg	2	Punisher	-5	-5	0	2	Loss	26	2021933	2021		weiblich	Deutschland	1	Ja	etwa im Durchschnitt	Ja	Online	0	0	0		3	0	0	0	0	0	1	0	0	0	0	0	0	0	0	0	0	1	0	0	0	0	0	1	0	punish 1:3
211124_0933	Magdeburg	19	Punisher	5	5	10	6	Gain	29	2021666	2021		männlich	Deutschland	1	Ja	ueber dem Durchschnitt	Ja	Online	0	0	0		3	0	0	0	0	0	1	0	0	0	0	0	0	0	0	0	0	1	0	0	0	0	0	1	0	punish 1:3
211124_0933	Magdeburg	5	Dictator	10	0	10	1	Gain	21	2021652	2021	100	weiblich	Deutschland	1	Ja	unter dem Durchschnitt	Ja	Online	0	0	0		3	0	0	0	0	0	1	0	0	0	0	0	0	0	0	0	0	1	0	0	0	0	0	1	0	punish 1:3
211208_1531	Leipzig	10	Dictator	5.5	4.5	5.5	4	Gain	31	2021751	2021	55	weiblich	Andere	0	Ja	etwa im Durchschnitt	Ja	Online	0	0	0		3	0	0	0	0	0	0	1	0	0	0	0	0	0	0	0	0	1	0	0	0	0	0	1	0	punish 1:3
210901_0944	Leipzig	16	Punisher	5	5	5	4	Gain	25	2021430	2021		keine Angabe	Deutschland	1	Ja	keine Angabe	Ja	Online	0	0	0		3	0	0	0	0	0	1	0	0	0	0	0	0	0	0	0	0	0	1	0	0	0	0	1		punish 1:3
211208_1531	Leipzig	3	Punisher	5	5	10	5	Gain	26	2021744	2021		männlich	Deutschland	1	Ja	etwa im Durchschnitt	Ja	Online	0	0	0		3	0	0	0	0	0	1	0	0	0	0	0	0	0	0	0	1	1	1	0	0	0	0	1	0	punish 1:3
210901_0944	Leipzig	13	Punisher	5	5	5	3	Gain	29	2021427	2021		weiblich	Deutschland	1	Ja	ueber dem Durchschnitt	Ja	Online	0	0	0		3	0	0	0	0	0	1	0	0	0	0	0	0	0	0	0	0	1	0	0	0	0	0	1		punish 1:3
211208_1531	Leipzig	6	Dictator	5	5	5	5	Gain	26	2021747	2021	50	weiblich	Deutschland	1	Nein	etwa im Durchschnitt	Ja	Online	0	0	0		3	0	0	0	0	0	1	0	0	0	0	0	0	0	0	0	0	1	0	0	0	0	0	1	0	punish 1:3
211130_1437	Magdeburg	9	Dictator	0	-10	-6	3	Loss	29	2021870	2021	100	männlich	Deutschland	1	Ja	weit unter dem Durchschnitt	Ja	Online	0	1			3	0	0	0	0	0	1	0	0	0	0	0	0	0	0	0	1	1	1	0	0	0	0	1	0	punish 1:3
211203_0934	Leipzig	1	Punisher	-5	-5	0	8	Loss	21	2021842	2021		weiblich	Deutschland	1	Ja	ueber dem Durchschnitt	Nein	Online	0	0	0		3	0	0	0	0	1	1	1	0	0	0	0	0	0	0	0	1	1	1	0	0	0	0	1	0	punish 1:3
210908_1650	Leipzig	13	Punisher	-4.5	-5.5	0	8	Loss	38	2021535	2021		männlich	Deutschland	1	Ja	ueber dem Durchschnitt	Ja	Online	0	0	0	0	3	0	0	0	0	0	1	0	0	0	0	0	0	0	0	0	1	1	1	1	0	0	0	1		punish 1:3
211123_1442	Magdeburg	2	Punisher	10	0	10	6	Gain	21	2021637	2021		weiblich	Deutschland	1	Ja	etwa im Durchschnitt	Ja	Online	0	0	0		3	0	0	0	0	0	1	1	1	0	0	0	0	0	0	0	1	1	1	0	0	0	0	1	0	punish 1:3
211208_0928	Leipzig	15	Punisher	4.5	5.5	10	8	Gain	25	2021739	2021		männlich	Deutschland	1	Ja	ueber dem Durchschnitt	Nein	Online	0	0	0		3	0	0	0	0	0	1	0	0	0	0	0	0	0	0	0	0	1	0	0	0	0	0	1	0	punish 1:3
221111_1242	Leipzig	1	Punisher	-5	-5	0	7	Loss	32	2022013	2022		weiblich	Deutschland	1		unter dem Durchschnitt	Ja	Online	0	0	0		3	0	0	0	0	1	1	1	0	0	0	0	0	0	0	0	1	1	1	0	0	0	0	1	0	punish 1:3
210901_0944	Leipzig	8	Punisher	5	5	5	1	Gain	26	2021422	2021		männlich	Deutschland	1	Ja	etwa im Durchschnitt	Ja	Online	0	0	0		3	0	0	0	0	1	1	1	0	0	0	0	0	0	0	1	1	1	1	1	0	0	0	1		punish 1:3
211208_0928	Leipzig	5	Dictator	5	5	5	1	Gain	26	2021729	2021	50	weiblich	Deutschland	1	Ja	ueber dem Durchschnitt	Ja	Online	0	0	0		3	0	0	0	0	0	1	0	0	0	0	0	0	0	0	0	0	1	0	0	0	0	0	1	0	punish 1:3
211208_0928	Leipzig	4	Punisher	6	4	10	5	Gain	23	2021728	2021		weiblich	Deutschland	1	Ja	ueber dem Durchschnitt	Ja	Online	0	0	0		3	0	0	0	0	0	1	0	0	0	0	0	0	0	0	0	0	1	0	0	0	0	0	1	0	punish 1:3
210901_0944	Leipzig	4	Dictator	9		3	5	Gain	22	2021418	2021	90	männlich	Deutschland	1	Ja	etwa im Durchschnitt	Ja	Online	0	1	0		3	0	0	0	0	0	1	0	0	0	0	0	0	0	0	0	0	1	0	0	0	0	0	1		punish 1:3
211130_1437	Magdeburg	6	Punisher	-2	-8	0	1	Loss	24	2021904	2021		weiblich	Deutschland	1	Ja	etwa im Durchschnitt	Ja	Online	0	0	0		3	0	0	0	0	0	1	0	0	0	0	0	0	0	0	0	0	1	0	0	0	0	0	1	0	punish 1:3
221111_1242	Leipzig	10	Dictator	-3	-7	-3	6	Loss	21	2022046	2022	70	weiblich	Deutschland	1	Ja	ueber dem Durchschnitt	Ja	Online	0	0			3	0	0	0	0	1	1	1	0	0	0	0	0	0	0	0	1	1	1	0	0	0	0	1	0	punish 1:3
210901_0944	Leipzig	3	Dictator	4.5		4.5	7	Gain	28	2021417	2021	45	weiblich	Deutschland	1	Nein	etwa im Durchschnitt	Ja	Online	0	0	0		3	0	0	0	0	0	1	0	0	0	0	0	0	0	0	0	0	1	0	0	0	0	0	1		punish 1:3
210908_1650	Leipzig	2	Punisher	-5	-5	0	7	Loss	28	2021524	2021		männlich	Deutschland	1		etwa im Durchschnitt	Nein	Online	0	0	0	0	3	0	0	0	0	0	1	0	0	0	0	0	0	0	0	0	0	1	0	0	0	0	0	1		punish 1:3
211203_0934	Leipzig	11	Punisher	-5	-5	0	6	Loss	33	2021931	2021		weiblich	Deutschland	1	Ja	unter dem Durchschnitt	Ja	Online	0	0	0		3	0	0	0	0	0	1	0	0	0	0	0	0	0	0	0	0	1	0	0	0	0	0	1	0	punish 1:3
211208_1531	Leipzig	8	Punisher	5.5	4.5	10	4	Gain	24	2021749	2021		weiblich	Deutschland	1	Ja	unter dem Durchschnitt	Nein	Online	0	0	0		3	0	0	0	0	0	1	0	0	0	0	0	0	0	0	0	0	1	0	0	0	0	0	1	0	punish 1:3
221111_1242	Leipzig	17	Punisher	-5	-5	0	9	Loss	26	2022018	2022		weiblich	Deutschland	1		ueber dem Durchschnitt	Ja	Online	0	0	0		3	0	0	0	0	1	1	1	0	0	0	0	0	0	0	0	0	1	1	0	0	0	0	1	0	punish 1:3
221111_1242	Leipzig	13	Dictator	-2	-8	-2	3	Loss	38	2022019	2022	80	weiblich	Deutschland	1	Ja	etwa im Durchschnitt	Nein	Online	0	0			3	0	0	0	0	0	1	0	0	0	0	0	0	0	0	0	0	0	0	0	1	0	0	1	0	punish 1:3
221111_1242	Leipzig	2	Punisher	0	-10	0	2	Loss	24	2022034	2022		weiblich	Deutschland	1	Ja	ueber dem Durchschnitt	Ja	Online	0	0	0		3	0	0	0	0	0	1	0	0	0	0	0	0	0	0	0	0	1	0	0	0	0	0	1	0	punish 1:3
221111_1242	Leipzig	16	Punisher	-5	-5	0	10	Loss	23	2022017	2022		weiblich	Deutschland	1	Ja	ueber dem Durchschnitt	Ja	Online	0	0	0		3	0	0	0	0	0	1	0	0	0	0	0	0	0	0	0	0	1	0	0	0	0	0	1	0	punish 1:3
221111_1242	Leipzig	6	Dictator	-5	-5	-5	7	Loss	25	2022016	2022	50	weiblich	Deutschland	1	Ja	unter dem Durchschnitt	Nein	Online	0	0			3	0	0	0	0	0	1	0	0	0	0	0	0	0	0	0	0	1	0	0	0	0	0	1	0	punish 1:3
210908_0949	Leipzig	4	Dictator	-5		-5	3	Loss	31	2021502	2021	50	männlich	Deutschland	1	Ja	etwa im Durchschnitt	Nein	Online	0	0		5	3	0	0	0	0	0	1	0	0	0	0	0	0	0	0	0	0	1	0	0	0	0	0	1		punish 1:3
210908_1650	Leipzig	10	Punisher	-5	-5	0	2	Loss	25	2021549	2021		weiblich	Deutschland	1		etwa im Durchschnitt	Ja	Online	0	0	0	0	3	0	0	0	0	0	0	1	0	0	0	0	0	0	0	0	0	1	0	0	0	0	0	1		punish 1:3
211123_1442	Magdeburg	10	Dictator	5	5	5	4	Gain	31	2021645	2021	50	weiblich	Deutschland	1	Ja	etwa im Durchschnitt	Ja	Online	0	0	0		3	0	0	0	0	0	1	0	0	0	0	0	0	0	0	0	0	1	0	0	0	0	0	1	0	punish 1:3
211123_1442	Magdeburg	6	Dictator	10	0	10	6	Gain	21	2021641	2021	100	männlich	Deutschland	1	Ja	ueber dem Durchschnitt	Nein	Online	0	0	0		3	0	0	0	0	0	1	0	0	0	0	0	0	0	0	0	0	1	0	0	0	0	0	1	0	punish 1:3
211203_0934	Leipzig	13	Dictator	-2	-8	-2	3	Loss	29	2021887	2021	80	weiblich	Deutschland	1		ueber dem Durchschnitt	Nein	Online	0	0			3	0	0	0	0	0	1	0	0	0	0	0	0	0	0	1	1	1	1	1	0	0	0	1	0	punish 1:3
211124_0933	Magdeburg	9	Dictator	5	5	5	2	Gain	32	2021656	2021	50	weiblich	Deutschland	1	Ja	weit unter dem Durchschnitt	Ja	Online	0	0	0		3	0	0	0	0	0	1	0	0	0	0	0	0	0	0	0	0	1	0	0	0	0	0	1	0	punish 1:3
221111_1242	Leipzig	8	Dictator	-5	-5	-5	9	Loss	22	2022030	2022	50	weiblich	Deutschland	1	Ja	etwa im Durchschnitt	Ja	Online	0	0			3	0	0	0	0	0	1	0	0	0	0	0	0	0	0	0	0	1	0	0	0	0	0	1	0	punish 1:3
211203_1236	Leipzig	3	Punisher	-5	-5	0	1	Loss	25	2021835	2021		weiblich	Deutschland	1	Ja	unter dem Durchschnitt	Nein	Online	0	0	0		3	0	0	0	0	1	1	0	0	0	0	0	0	0	0	0	1	1	1	0	0	0	0	1	0	punish 1:3
210901_0944	Leipzig	11	Punisher	4.5	5.5	5	7	Gain	23	2021425	2021		keine Angabe	Deutschland	1	Ja	ueber dem Durchschnitt	Nein	Online	0	0	0		3	0	0	0	0	1	1	1	0	0	0	0	0	0	0	0	1	1	1	0	0	0	0	1		punish 1:3
211124_0933	Magdeburg	16	Dictator	6	4	6	3	Gain	31	2021663	2021	60	männlich	Deutschland	1	Ja	ueber dem Durchschnitt	Ja	Online	0	0	0		3	0	0	0	0	0	1	1	0	0	0	0	0	0	0	0	0	1	1	0	0	0	0	1	0	punish 1:3
211130_1437	Magdeburg	8	Dictator	0	-10	0	2	Loss	30	2021900	2021	100	weiblich	Deutschland	1	Ja	etwa im Durchschnitt	Nein	Online	0	0			3	0	0	0	0	0	1	0	0	0	0	0	0	0	1	0	0	0	0	0	0	0	0	1	0	punish 1:3
211124_0933	Magdeburg	18	Punisher	5	5	10	2	Gain	26	2021665	2021		männlich	Deutschland	1	Ja	weit unter dem Durchschnitt	Ja	Online	0	0	0		3	0	0	0	0	0	0	0	0	1	0	0	0	0	0	0	0	0	0	1	0	0	0	1	0	punish 1:3
211208_0928	Leipzig	10	Dictator	7	3	1	4	Gain	25	2021734	2021	70	männlich	Deutschland	1	Ja	unter dem Durchschnitt	Ja	Online	0	1	0		3	0	0	0	0	1	1	1	0	0	0	0	0	0	0	0	0	1	0	0	0	0	0	1	0	punish 1:3
211203_0934	Leipzig	5	Dictator	0	-10	-6	1	Loss	32	2021837	2021	100	weiblich	Deutschland	1		unter dem Durchschnitt	Ja	Online	0	1			3	0	0	0	0	0	1	0	0	0	0	0	0	0	0	0	0	1	0	0	0	0	0	1	0	punish 1:3
221111_1242	Leipzig	5	Punisher	-5	-5	0	4	Loss	23	2022042	2022		weiblich	Andere	0	Ja	unter dem Durchschnitt	Nein	Online	0	0	0		3	0	0	0	0	0	1	0	0	0	0	0	0	0	0	0	0	1	0	0	0	0	0	1	0	punish 1:3
211208_1531	Leipzig	5	Dictator	5.5	4.5	5.5	1	Gain	25	2021746	2021	55	männlich	Deutschland	1	Ja	ueber dem Durchschnitt	Ja	Online	0	0	0		3	0	0	0	0	1	1	1	0	0	0	0	0	0	0	0	1	1	1	0	0	0	0	1	0	punish 1:3
211208_0928	Leipzig	17	Punisher	7	3	10	6	Gain	25	2021741	2021		männlich	Deutschland	1	Ja	etwa im Durchschnitt	Nein	Online	0	0	0		3	0	1	1	1	1	1	1	1	1	1	0	0	0	0	1	1	1	1	1	0	0	0	1	0	punish 1:3
211208_0928	Leipzig	12	Dictator	6	4	6	7	Gain	23	2021736	2021	60	weiblich	Deutschland	1	Ja	ueber dem Durchschnitt	Nein	Online	0	0	0		3	0	0	0	0	0	1	0	0	0	0	0	0	0	0	0	0	1	0	0	0	0	0	1	0	punish 1:3
211123_1442	Magdeburg	9	Dictator	6	4	6	1	Gain	20	2021644	2021	60	männlich	Deutschland	1	Ja	etwa im Durchschnitt	Ja	Online	0	0	0		3	0	0	0	0	1	1	1	0	0	0	0	0	0	0	0	1	1	1	0	0	0	0	1	0	punish 1:3
221111_1242	Leipzig	18	Punisher	-2	-8	0	3	Loss	20	2022023	2022		männlich	Deutschland	1	Ja	ueber dem Durchschnitt	Ja	Online	0	0	0		3	0	0	0	0	0	1	0	0	0	0	0	0	0	0	0	0	1	0	0	0	0	0	1	0	punish 1:3
210901_0944	Leipzig	7	Punisher	9	1	3	5	Gain	24	2021421	2021		weiblich	Deutschland	1	Ja	etwa im Durchschnitt	Ja	Online	0	1	1		3	0	0	0	0	0	1	0	0	0	0	0	0	0	0	0	0	1	0	0	0	0	0	1		punish 1:3
211203_1236	Leipzig	7	Dictator	-4	-6	-4	5	Loss	29	2021843	2021	60	weiblich	Deutschland	1	Ja	unter dem Durchschnitt	Ja	Online	0	0			3	0	0	0	0	1	1	1	0	0	0	0	0	0	0	0	1	1	1	0	0	0	0	1	0	punish 1:3
210901_0944	Leipzig	2	Dictator	5		5	1	Gain	52	2021416	2021	50	weiblich	Deutschland	1	Nein	ueber dem Durchschnitt	Nein	Online	0	0	0		3	0	0	0	0	0	1	0	0	0	0	0	0	0	0	0	0	1	0	0	0	0	0	1		punish 1:3
221111_1242	Leipzig	19	Punisher	-5	-5	0	1	Loss	28	2022001	2022		weiblich	Deutschland	1	Ja	etwa im Durchschnitt	Ja	Online	0	0	0		3	0	0	0	0	1	1	1	0	0	0	0	0	0	0	0	1	1	1	0	0	0	0	1	0	punish 1:3
210901_1345	Leipzig	1	Punisher	5	5	5	2	Gain	28	2021431	2021		weiblich	Deutschland	1	Ja	etwa im Durchschnitt	Nein	Online	0	0	0		3	0	0	0	0	1	1	1	0	0	0	0	0	0	0	0	1	1	1	0	0	0	0	1		punish 1:3
210908_0949	Leipzig	2	Punisher	-5	-5	0	2	Loss	23	2021521	2021		weiblich	Deutschland	1	Ja	etwa im Durchschnitt	Nein	Online	0	0	0	0	3	0	0	0	0	0	1	0	0	0	0	0	0	0	0	0	0	1	0	0	0	0	0	1		punish 1:3
210908_1650	Leipzig	7	Punisher	-5	-5	0	6	Loss	23	2021536	2021		weiblich	Deutschland	1	Ja	unter dem Durchschnitt	Nein	Online	0	0	0	0	3	0	0	0	0	0	1	0	0	0	0	0	0	0	0	0	0	1	0	0	0	0	0	1		punish 1:3
211203_1236	Leipzig	9	Punisher	-7.5	-2.5	0	2	Loss		2021804	2021		männlich				unter dem Durchschnitt	Ja	Online	0	0	0		3	0	0	0	0	0	0	0	0	1	0	0	0	0	0	0	0	0	1	0	0	0	0	1	0	punish 1:3
210908_1650	Leipzig	14	Punisher	-5	-5	0	4	Loss	26	2021525	2021		weiblich	Deutschland	1		ueber dem Durchschnitt	Ja	Online	0	0	0	0	3	0	0	0	0	0	1	0	0	0	0	0	0	0	0	0	0	1	0	0	0	0	0	1		punish 1:3
211123_1442	Magdeburg	5	Punisher	5	5	10	4	Gain	20	2021640	2021		männlich	Deutschland	1	Ja	ueber dem Durchschnitt	Ja	Online	0	0	0		3	0	0	0	0	0	1	1	1	0	0	0	0	0	0	0	0	1	1	1	0	0	0	1	0	punish 1:3
211203_0934	Leipzig	3	Dictator	-5	-5	-5	6	Loss	25	2021862	2021	50	männlich	Deutschland	1	Ja	ueber dem Durchschnitt	Ja	Online	0	0			3	0	0	0	0	0	1	0	0	0	0	0	0	0	0	0	0	1	0	0	0	0	0	1	0	punish 1:3
211203_1236	Leipzig	11	Dictator	-5	-5	-5	1	Loss	30	2021805	2021	50	männlich	EU	0		ueber dem Durchschnitt	Ja	Online	0	0			3	1	1	1	1	1	0	1	1	1	1	1	0	0	0	0	1	1	1	0	0	0	0	1	0	punish 1:3
211203_0934	Leipzig	15	Punisher	-5	-5	0	4	Loss	24	2021909	2021		weiblich	Deutschland	1	Ja	ueber dem Durchschnitt	Nein	Online	0	0	0		3	0	0	0	0	1	1	1	0	0	0	0	0	0	0	0	0	1	1	0	0	0	0	1	0	punish 1:3
210901_1345	Leipzig	6	Punisher	5	5	5	3	Gain	28	2021436	2021		männlich	Deutschland	1	Ja	ueber dem Durchschnitt	Ja	Online	0	0	0		3	0	0	0	0	0	1	0	0	0	0	0	0	0	0	0	0	1	0	0	0	0	0	1		punish 1:3
221111_1242	Leipzig	4	Dictator	-5	-5	-5	5	Loss	25	2022043	2022	50	männlich	Deutschland	1	Ja	ueber dem Durchschnitt	Nein	Online	0	0			3	0	0	0	0	0	1	0	0	0	0	0	0	0	0	0	0	1	0	0	0	0	0	1	0	punish 1:3
211203_0934	Leipzig	4	Dictator	-5	-5	-5	7	Loss	35	2021924	2021	50	weiblich	Andere	0	Ja	weit unter dem Durchschnitt	Ja	Online	0	0			3	0	0	0	0	0	1	0	0	0	0	0	0	0	0	0	0	1	0	0	0	0	0	1	0	punish 1:3
211208_1531	Leipzig	2	Punisher	5	5	10	3	Gain	43	2021743	2021		weiblich	Deutschland	1	Ja	unter dem Durchschnitt	Ja	Online	0	0	0		3	0	0	0	0	0	1	0	0	0	0	0	0	0	0	0	0	1	0	0	0	0	0	1	0	punish 1:3
211123_1442	Magdeburg	7	Dictator	5	5	5	5	Gain	22	2021642	2021	50	weiblich	Deutschland	1	Ja	etwa im Durchschnitt	Nein	Online	0	0	0		3	0	0	0	0	0	1	0	0	0	0	0	0	0	0	0	1	1	1	0	0	0	0	1	0	punish 1:3
211208_0928	Leipzig	7	Punisher	7	3	8	4	Gain	27	2021731	2021		männlich	Andere	0	Nein	unter dem Durchschnitt	Ja	Online	0	1	1		3	0	0	0	0	0	0	0	0	0	0	0	0	0	0	0	0	1	0	0	0	0	0	1	0	punish 1:3
211130_1437	Magdeburg	2	Punisher	0	-10	0	2	Loss	24	2021885	2021		weiblich	EU	0	Ja	etwa im Durchschnitt	Ja	Online	0	0	0		3	0	0	0	0	0	1	1	0	0	0	0	0	0	0	0	1	1	1	1	1	0	0	1	0	punish 1:3
211208_0928	Leipzig	3	Dictator	5	5	5	3	Gain	33	2021727	2021	50	weiblich	Deutschland	1	Ja	keine Angabe	Nein	Online	0	0	0		3	0	0	0	0	0	1	0	0	0	0	0	0	0	0	0	0	1	0	0	0	0	0	1	0	punish 1:3
211208_1531	Leipzig	7	Dictator	5	5	5	2	Gain	55	2021748	2021	50	männlich	Deutschland	1	Ja	unter dem Durchschnitt	Ja	Online	0	0	0		3	0	0	0	0	0	1	0	0	0	0	0	0	0	0	0	0	1	0	0	0	0	0	1	0	punish 1:3
210901_0944	Leipzig	5	Punisher	10	0	5	6	Gain	26	2021419	2021		weiblich	Deutschland	1	Nein	etwa im Durchschnitt	Ja	Online	0	0	0		3	0	0	0	0	0	0	0	0	0	0	0	0	0	0	0	1	1	1	0	0	0	0	1		punish 1:3
210901_0944	Leipzig	12	Dictator	10		10	6	Gain	23	2021426	2021	100	männlich	Deutschland	1	Ja	ueber dem Durchschnitt	Ja	Online	0	0	0		3	0	0	0	0	1	1	1	0	0	0	0	0	0	0	1	1	1	1	0	0	0	0	1		punish 1:3
211203_1236	Leipzig	5	Dictator	0	-10	-6	4	Loss	25	2021860	2021	100	weiblich	Andere	0	Ja	etwa im Durchschnitt	Ja	Online	0	1			3	0	0	0	0	0	1	0	0	0	0	0	0	0	0	1	0	0	0	0	0	0	0	1	0	punish 1:3
211208_1531	Leipzig	1	Dictator	5	5	5	3	Gain	29	2021742	2021	50	männlich	Deutschland	1	Ja	ueber dem Durchschnitt	Ja	Online	0	0	0		3	0	0	0	0	0	1	0	0	0	0	0	0	0	0	0	1	1	1	0	0	0	0	1	0	punish 1:3
211124_0933	Magdeburg	2	Dictator	7	3	7	7	Gain		2021649	2021	70	weiblich	Deutschland	1	Ja	ueber dem Durchschnitt	Ja	Online	0	0	0		3	0	0	0	0	0	1	0	0	0	0	0	0	0	0	0	0	1	0	0	0	0	0	1	0	punish 1:3
211203_0934	Leipzig	9	Dictator	-5	-5	-5	2	Loss	30	2021901	2021	50	weiblich	Deutschland	1		etwa im Durchschnitt	Nein	Online	0	0			3	0	0	0	0	0	1	0	0	0	0	0	0	0	0	0	0	1	0	0	0	0	0	1	0	punish 1:3
211203_0934	Leipzig	12	Punisher	0	-10	-2	1	Loss	29	2021825	2021		weiblich	Deutschland	1	Ja	etwa im Durchschnitt	Ja	Online	0	1	1		3	0	0	0	0	0	1	0	0	0	0	0	0	0	0	0	0	1	0	0	0	0	0	1	0	punish 1:3
211123_1442	Magdeburg	4	Dictator	10	0	10	2	Gain		2021639	2021	100	männlich	Deutschland	1	Ja	etwa im Durchschnitt	Ja	Online	0	0	0		3	0	0	0	0	0	1	0	0	0	0	0	0	0	0	0	0	1	0	0	0	0	0	1	0	punish 1:3
210908_0949	Leipzig	7	Dictator	-5		-5	2	Loss	25	2021543	2021	50	weiblich	Deutschland	1	Ja	etwa im Durchschnitt	Nein	Online	0	0		5	3	0	0	0	0	0	1	0	0	0	0	0	0	0	0	0	0	1	0	0	0	0	0	1		punish 1:3
211130_1437	Magdeburg	7	Punisher	0	-10	0	4	Loss	28	2021818	2021		männlich	Deutschland	1		ueber dem Durchschnitt	Ja	Online	0	0	0		3	0	0	0	0	0	1	0	0	0	0	0	0	0	0	0	0	1	0	0	0	0	0	1	0	punish 1:3
210901_1345	Leipzig	5	Dictator	5		5	1	Gain	22	2021435	2021	50	männlich	Deutschland	1	Ja	unter dem Durchschnitt	Ja	Online	0	0	0		3	0	0	0	0	0	1	0	0	0	0	0	0	0	0	0	0	1	0	0	0	0	0	1		punish 1:3
211208_0928	Leipzig	8	Punisher	5	5	10	2	Gain	34	2021732	2021		weiblich	Deutschland	1	Ja	unter dem Durchschnitt	Nein	Online	0	0	0		3	0	0	0	0	0	1	0	0	0	0	0	0	0	0	0	0	1	0	0	0	0	0	1	0	punish 1:3
211203_0934	Leipzig	2	Punisher	-5	-5	0	2	Loss	22	2021895	2021		männlich	Andere	0	Ja	unter dem Durchschnitt	Nein	Online	0	0	0		3	0	0	0	0	1	1	1	0	0	0	0	0	0	0	0	1	1	1	0	0	0	0	1	0	punish 1:3
210908_1650	Leipzig	6	Punisher	-5.5	-4.5	0	3	Loss	28	2021516	2021		weiblich	Deutschland	1	Ja	etwa im Durchschnitt	Ja	Online	0	0	0	0	3	0	0	0	0	0	1	0	0	0	0	0	0	0	0	0	0	1	0	0	0	0	0	1		punish 1:3
211203_1236	Leipzig	10	Punisher	-4	-6	0	5	Loss		2021855	2021		männlich	Deutschland	1		ueber dem Durchschnitt	Nein	Online	0	0	0		3	0	0	0	0	1	0	0	0	0	0	0	0	0	0	0	1	0	0	0	0	0	0	1	0	punish 1:3
211124_0933	Magdeburg	8	Dictator	5	5	5	9	Gain	23	2021655	2021	50	männlich	Deutschland	1	Ja	ueber dem Durchschnitt	Ja	Online	0	0	0		3	0	0	0	0	0	1	0	0	0	0	0	0	0	0	0	0	1	0	0	0	0	0	1	0	punish 1:3
221111_1242	Leipzig	15	Dictator	-5	-5	-5	10	Loss	21	2022004	2022	50	weiblich	Deutschland	1	Ja	etwa im Durchschnitt	Ja	Online	0	0			3	0	0	0	0	0	1	0	0	0	0	0	0	0	0	0	0	1	0	0	0	0	0	1	0	punish 1:3
211203_0934	Leipzig	14	Punisher	-5	-5	0	7	Loss	25	2021847	2021		männlich	Deutschland	1	Ja	unter dem Durchschnitt	Ja	Online	0	0	0		3	0	0	0	0	0	1	0	0	0	0	0	0	0	0	0	0	1	0	0	0	0	0	1	0	punish 1:3
211201_0938	Magdeburg	4	Punisher	0	-10	0	1	Loss	23	2021846	2021		männlich	Deutschland	1	Ja	etwa im Durchschnitt	Nein	Online	0	0	0		3	0	0	0	0	1	1	1	0	0	0	0	0	0	0	1	1	1	1	1	0	0	0	1	0	punish 1:3
211208_0928	Leipzig	6	Dictator	6	4	6	5	Gain	30	2021730	2021	60	männlich	Deutschland	1	Ja	ueber dem Durchschnitt	Ja	Online	0	0	0		3	0	0	0	0	0	0	1	0	0	0	0	0	0	0	0	0	1	0	0	0	0	0	1	0	punish 1:3
211208_0928	Leipzig	2	Dictator	7	3	7	6	Gain	35	2021726	2021	70	männlich	Deutschland	1	Nein	etwa im Durchschnitt	Ja	Online	0	0	0		3	0	0	0	0	0	0	0	0	0	0	0	0	0	0	0	1	1	1	0	0	0	0	1	0	punish 1:3
211203_1236	Leipzig	8	Punisher	0	-10	-2	4	Loss	29	2021886	2021		keine Angabe	Deutschland	1	Ja	ueber dem Durchschnitt	Nein	Online	0	1	1		3	0	0	0	0	0	1	0	0	0	0	0	0	0	0	0	0	1	0	0	0	0	0	1	0	punish 1:3
211123_1442	Magdeburg	3	Punisher	6	4	10	3	Gain	23	2021638	2021		weiblich	Deutschland	1	Ja	weit unter dem Durchschnitt	Ja	Online	0	0	0		3	1	1	1	1	1	1	1	1	1	1	1	0	0	0	0	0	1	1	0	0	0	0	1	0	punish 1:3
210908_1650	Leipzig	3	Dictator	-5		-5	2	Loss	30	2021539	2021	50	männlich	Deutschland	1		ueber dem Durchschnitt	Ja	Online	0	0		5	3	0	0	0	0	0	1	0	0	0	0	0	0	0	0	0	0	1	0	0	0	0	0	1		punish 1:3
211123_1442	Magdeburg	12	Dictator	6	4	6	3	Gain		2021647	2021	60	männlich	Deutschland	1	Nein	unter dem Durchschnitt	Ja	Online	0	0	0		3	0	0	0	0	0	0	1	0	0	0	0	0	0	0	0	1	1	1	0	0	0	0	1	0	punish 1:3
211123_1442	Magdeburg	1	Punisher	10	0	10	2	Gain	25	2021636	2021		keine Angabe	Deutschland	1	Nein	weit unter dem Durchschnitt	Ja	Online	0	0	0		3	0	0	0	0	0	1	0	0	0	0	0	0	0	0	0	0	1	0	0	0	0	0	1	0	punish 1:3
211124_0933	Magdeburg	4	Dictator	5	5	5	6	Gain	31	2021651	2021	50	männlich	Deutschland	1	Ja	unter dem Durchschnitt	Nein	Online	0	0	0		3	1	1	1	1	1	1	1	1	1	1	1	0	0	0	0	1	1	1	0	0	0	0	1	0	punish 1:3
211124_0933	Magdeburg	17	Punisher	10	0	10	1	Gain	21	2021664	2021		weiblich	Deutschland	1	Ja	ueber dem Durchschnitt	Ja	Online	0	0	0		3	0	0	0	0	0	1	0	0	0	0	0	0	0	0	0	0	1	0	0	0	0	0	1	0	punish 1:3
211124_0933	Magdeburg	1	Dictator	10	0	10	10	Gain	22	2021648	2021	100	weiblich	EU	0	Ja	ueber dem Durchschnitt	Nein	Online	0	0	0		3	0	0	0	0	0	0	0	0	1	0	0	1	0	0	0	0	0	0	0	0	0	1	1	1	punish 1:3
210901_1345	Leipzig	4	Dictator	5		5	3	Gain	42	2021434	2021	50	männlich	Deutschland	1	Nein	etwa im Durchschnitt	Ja	Online	0	0	0		3	0	0	0	0	0	1	0	0	0	0	0	0	0	0	0	0	1	0	0	0	0	0	1		punish 1:3
211201_0938	Magdeburg	3	Dictator	0	-10	0	1	Loss	29	2021821	2021	100	männlich	Deutschland	1	Ja	unter dem Durchschnitt	Ja	Online	0	0			3	0	0	0	0	0	1	0	0	0	0	0	0	0	0	0	0	1	0	0	0	0	0	1	0	punish 1:3
210901_1345	Leipzig	3	Dictator	5		5	2	Gain	25	2021433	2021	50	männlich	Deutschland	1	Ja	weit unter dem Durchschnitt	Ja	Online	0	0	0		3	0	0	0	0	0	1	0	0	0	0	0	0	0	0	0	0	1	0	0	0	0	0	1		punish 1:3
211203_0934	Leipzig	6	Dictator	-5	-5	-5	4	Loss	28	2021934	2021	50	weiblich	Deutschland	1	Ja	weit unter dem Durchschnitt	Ja	Online	0	0			3	0	0	0	0	0	1	0	0	0	0	0	0	0	0	0	0	1	0	0	0	0	0	1	0	punish 1:3
211124_0933	Magdeburg	7	Dictator	5	5	5	4	Gain	25	2021654	2021	50	weiblich	Deutschland	1	Ja	ueber dem Durchschnitt	Ja	Online	0	0	0		3	0	0	0	0	0	1	0	0	0	0	0	0	0	0	0	0	1	0	0	0	0	0	1	0	punish 1:3
211208_0928	Leipzig	16	Punisher	5	5	10	1	Gain	28	2021740	2021		weiblich	Deutschland	1	Ja	etwa im Durchschnitt	Ja	Online	0	0	0		3	0	0	0	0	0	1	0	0	0	0	0	0	0	0	0	0	0	1	0	0	0	0	1	0	punish 1:3
211124_0933	Magdeburg	15	Dictator	5	5	5	5	Gain	31	2021662	2021	50	männlich	Deutschland	1	Ja	unter dem Durchschnitt	Ja	Online	0	0	0		3	0	0	0	0	0	1	0	0	0	0	0	0	0	0	0	0	1	0	0	0	0	0	1	0	punish 1:3
211203_1236	Leipzig	4	Dictator	-7.5	-2.5	-7.5	2	Loss	69	2021916	2021	25	männlich	Deutschland	1		etwa im Durchschnitt	Ja	Online	0	0			3	0	0	0	1	0	0	0	0	0	0	0	0	0	0	0	0	1	0	0	0	0	0	1	0	punish 1:3
211123_1442	Magdeburg	11	Punisher	6	4	10	1	Gain	30	2021646	2021		männlich	Deutschland	1	Ja	etwa im Durchschnitt	Ja	Online	0	0	0		3	0	0	0	0	0	1	0	0	0	0	0	0	0	0	0	0	1	0	0	0	0	0	1	0	punish 1:3
211203_1236	Leipzig	2	Dictator	0	-10	-6	3	Loss	28	2021907	2021	100	weiblich	Deutschland	1	Ja	unter dem Durchschnitt	Nein	Online	0	1			3	0	0	0	0	0	1	0	0	0	0	0	0	0	0	0	0	1	0	0	0	0	0	1	0	punish 1:3
211203_1236	Leipzig	1	Dictator	-5	-5	-5	6	Loss	22	2021823	2021	50	weiblich	Deutschland	1	Ja	ueber dem Durchschnitt	Nein	Online	0	0			3	0	0	0	0	0	1	0	0	0	0	0	0	0	0	1	1	1	0	0	0	0	0	1	1	punish 1:3
210908_1650	Leipzig	16	Punisher	-5	-5	0	5	Loss	30	2021546	2021		männlich	Deutschland	1		weit unter dem Durchschnitt	Ja	Online	0	0	0	0	3	0	0	0	0	1	1	1	1	0	0	0	0	0	0	0	1	1	1	0	0	0	0	1		punish 1:3
210908_1650	Leipzig	4	Dictator	-5		-5	7	Loss	26	2021522	2021	50	weiblich	Deutschland	1	Ja	ueber dem Durchschnitt	Ja	Online	0	0		5	3	0	0	0	0	0	1	0	0	0	0	0	0	0	0	0	0	1	0	0	0	0	0	1		punish 1:3
211203_0934	Leipzig	10	Dictator	-5	-5	-5	8	Loss	38	2021844	2021	50	keine Angabe	Deutschland	1	Ja	ueber dem Durchschnitt	Ja	Online	0	0			3	0	0	0	0	0	1	0	0	0	0	0	0	0	0	0	0	1	0	0	0	0	0	1	0	punish 1:3
210901_0944	Leipzig	9	Dictator	5		5	2	Gain	28	2021423	2021	50	weiblich	Deutschland	1	Nein	unter dem Durchschnitt	Nein	Online	0	0	0		3	0	0	0	0	0	1	0	0	0	0	0	0	0	0	0	1	1	1	0	0	0	0	1		punish 1:3
210908_1650	Leipzig	11	Dictator	-5		-5	6	Loss	21	2021507	2021	50	weiblich	Deutschland	1	Ja	unter dem Durchschnitt	Nein	Online	0	0		5	3	0	0	0	0	0	1	0	0	0	0	0	0	0	0	0	0	1	0	0	0	0	0	1		punish 1:3
221111_1242	Leipzig	12	Dictator	-5	-5	-5	1	Loss	36	2022053	2022	50	männlich	Deutschland	1		unter dem Durchschnitt	Nein	Online	0	0			3	0	0	0	0	0	1	0	0	0	0	0	0	0	0	0	0	1	0	0	0	0	0	1	0	punish 1:3
210901_0944	Leipzig	6	Dictator	5		5	4	Gain	28	2021420	2021	50	weiblich	Deutschland	1	Ja	unter dem Durchschnitt	Ja	Online	0	0	0		3	0	0	0	0	0	1	0	0	0	0	0	0	0	0	0	1	1	1	0	0	0	0	1		punish 1:3
211203_0934	Leipzig	16	Punisher	-2	-8	0	3	Loss	25	2021877	2021		weiblich	Deutschland	1	Ja	unter dem Durchschnitt	Nein	Online	0	0	0		3	0	0	0	0	0	1	0	0	0	0	0	0	0	0	0	0	1	0	0	0	0	0	1	0	punish 1:3
211124_0933	Magdeburg	3	Punisher	5	5	10	4	Gain	31	2021650	2021		männlich	Deutschland	1	Ja	ueber dem Durchschnitt	Ja	Online	0	0	0		3	0	0	0	0	0	0	1	0	0	0	0	0	0	0	0	0	1	0	0	0	0	0	1	0	punish 1:3
210901_0944	Leipzig	1	Punisher	5	5	5	8	Gain	33	2021415	2021		weiblich	Deutschland	1	Nein	etwa im Durchschnitt	Ja	Online	0	0	0		3	0	0	0	0	0	1	0	0	0	0	0	0	0	0	0	0	0	1	0	0	0	0	1		punish 1:3
211123_1442	Magdeburg	8	Punisher	5	5	10	5	Gain	27	2021643	2021		männlich	Deutschland	1	Ja	etwa im Durchschnitt	Nein	Online	0	0	0		3	0	0	0	0	0	1	1	0	0	0	0	0	0	0	0	0	1	1	1	1	1	1	1	0	punish 1:3
210908_0949	Leipzig	3	Dictator	-5		-5	1	Loss	37	2021526	2021	50	weiblich	Deutschland	1		ueber dem Durchschnitt	Ja	Online	0	0		5	3	0	0	0	0	0	1	0	0	0	0	0	0	0	0	0	0	1	0	0	0	0	0	1		punish 1:3
221111_1242	Leipzig	14	Punisher	0	-10	0	8	Loss	21	2022011	2022		weiblich	Deutschland	1	Ja	ueber dem Durchschnitt	Nein	Online	0	0	0		3	0	0	0	0	0	1	0	0	0	0	0	0	0	0	0	0	1	0	0	0	0	0	1	0	punish 1:3
210908_1650	Leipzig	5	Dictator	-5.5		-5.5	3	Loss	24	2021532	2021	45	weiblich	Deutschland	1	Ja	etwa im Durchschnitt	Ja	Online	0	0		5	3	0	0	0	0	0	1	0	0	0	0	0	0	0	0	0	0	1	0	0	0	0	0	1		punish 1:3
211130_1437	Magdeburg	3	Punisher	0	-10	-2	3	Loss	24	2021915	2021		weiblich	Deutschland	1	Ja	etwa im Durchschnitt	Nein	Online	0	1	1		3	0	0	0	0	1	1	1	0	0	0	0	0	0	0	1	0	1	0	1	0	0	0	1	0	punish 1:3
221111_1242	Leipzig	3	Punisher	-3	-7	0	6	Loss	27	2022029	2022		weiblich	Deutschland	1	Ja	ueber dem Durchschnitt	Ja	Online	0	0	0		3	0	0	0	0	0	0	1	1	0	0	0	0	0	0	0	0	1	1	1	0	0	0	1	0	punish 1:3
210908_1650	Leipzig	8	Dictator	-4.5		-10	1	Loss	40	2021519	2021	55	weiblich	Deutschland	1		ueber dem Durchschnitt	Ja	Online	0	1		5	3	0	0	0	0	0	1	0	0	0	0	0	0	0	0	0	1	0	0	0	0	0	0	1		punish 1:3
211124_0933	Magdeburg	11	Punisher	6	4	10	3	Gain	20	2021658	2021		männlich	Deutschland	1	Ja	ueber dem Durchschnitt	Nein	Online	0	0	0		3	0	0	0	0	0	1	0	0	0	0	0	0	0	0	0	0	1	0	0	0	0	0	1	0	punish 1:3
210908_0949	Leipzig	1	Punisher	-5	-5	0	4	Loss	31	2021537	2021		weiblich	Deutschland	1	Ja	ueber dem Durchschnitt		Online	0	0	0	0	3	0	0	0	0	0	1	0	0	0	0	0	0	0	0	0	0	1	0	0	0	0	0	1		punish 1:3
211124_0933	Magdeburg	13	Dictator	9	1	9	8	Gain	25	2021660	2021	90	männlich	Deutschland	1	Ja	weit ueber dem Durchschnitt		Online	0	0	0		3	0	1	1	1	1	1	1	1	1	1	0	0	0	0	0	1	1	1	0	0	0	0	1	0	punish 1:3
210908_1650	Leipzig	12	Punisher	-4.5	-5.5	-2	1	Loss	31	2021544	2021		weiblich	Deutschland	1	Ja	unter dem Durchschnitt	Ja	Online	0	1	1	0	3	0	0	0	0	0	1	0	0	0	0	0	0	0	0	0	0	1	0	0	0	0	0	1		punish 1:3
221111_1242	Leipzig	9	Dictator	0	-10	0	8	Loss	36	2022009	2022	100	weiblich	Deutschland	1		etwa im Durchschnitt	Ja	Online	0	0			3	0	0	0	0	0	1	0	0	0	0	0	0	0	0	0	0	1	0	0	0	0	0	1	0	punish 1:3
211130_1437	Magdeburg	1	Dictator	-10	0	-10	5	Loss	27	2021913	2021	0	weiblich	Deutschland	1	Ja	etwa im Durchschnitt	Nein	Online	0	0			3	1	0	0	0	0	0	0	0	0	0	0	1	1	1	1	1	1	0	0	0	0	0	1	1	punish 1:3
211208_1531	Leipzig	4	Punisher	5.5	4.5	10	1	Gain	26	2021745	2021		weiblich	Deutschland	1	Ja	unter dem Durchschnitt	Nein	Online	0	0	0		3	0	0	0	0	0	1	0	0	0	0	0	0	0	0	0	0	1	0	0	0	0	0	1	0	punish 1:3
210908_1650	Leipzig	9	Dictator	-5		-5	5	Loss	25	2021504	2021	50	weiblich	Deutschland	1	Ja	ueber dem Durchschnitt	Nein	Online	0	0		5	3	0	0	0	0	0	1	0	0	0	0	0	0	0	0	0	0	1	0	0	0	0	0	1		punish 1:3
210901_0944	Leipzig	15	Dictator	5		5	3	Gain	21	2021429	2021	50	männlich	Deutschland	1	Ja	ueber dem Durchschnitt	Nein	Online	0	0	0		3	0	0	0	0	0	1	0	0	0	0	0	0	0	0	0	0	1	0	0	0	0	0	1		punish 1:3
210901_0944	Leipzig	10	Punisher	5	5	5	2	Gain	24	2021424	2021		weiblich	Deutschland	1	Ja	etwa im Durchschnitt	Ja	Online	0	0	0		3	0	0	0	0	0	1	0	0	0	0	0	0	0	0	0	0	1	0	0	0	0	0	1		punish 1:3
211124_0933	Magdeburg	14	Punisher	5	5	10	9	Gain	27	2021661	2021		weiblich	Andere	0	Ja	etwa im Durchschnitt	Nein	Online	0	0	0		3	0	0	0	0	0	1	0	0	0	0	0	0	0	0	0	0	1	0	0	0	0	0	1	0	punish 1:3
210908_1650	Leipzig	1	Dictator	-4.5		-4.5	8	Loss	24	2021530	2021	55	weiblich	Deutschland	1	Ja	unter dem Durchschnitt	Ja	Online	0	0		5	3	0	0	0	0	0	1	0	0	0	0	0	0	0	0	0	1	1	1	0	0	0	0	1		punish 1:3
211124_0933	Magdeburg	10	Punisher	5	5	10	5	Gain	25	2021657	2021		weiblich	Deutschland	1	Ja	etwa im Durchschnitt	Nein	Online	0	0	0		3	0	0	0	0	1	1	1	0	0	0	0	0	0	0	0	1	1	1	0	0	0	0	1	0	punish 1:3
210901_1345	Leipzig	2	Punisher	5	5	5	1	Gain	25	2021432	2021		weiblich	Deutschland	1	Nein	weit unter dem Durchschnitt	Nein	Online	0	0	0		3	0	0	0	0	0	1	0	0	0	0	0	0	0	0	0	0	1	0	0	0	0	0	1		punish 1:3
210901_0944	Leipzig	14	Dictator	5		5	8	Gain	23	2021428	2021	50	weiblich	Deutschland	1	Ja	etwa im Durchschnitt	Ja	Online	0	0	0		3	0	0	0	0	0	1	0	0	0	0	0	0	0	0	0	0	1	0	0	0	0	0	1		punish 1:3
211130_1437	Magdeburg	4	Dictator	0	-10	0	4	Loss	21	2021820	2021	100	weiblich	Deutschland	1	Ja	etwa im Durchschnitt	Ja	Online	0	0			3	0	0	0	0	0	1	0	0	0	0	0	0	0	0	0	0	1	0	0	0	0	0	1	0	punish 1:3
210908_0949	Leipzig	8	Punisher	-5	-5	0	3	Loss	23	2021547	2021		weiblich	Deutschland	1	Ja	ueber dem Durchschnitt	Ja	Online	0	0	0	0	3	0	0	0	0	0	1	0	0	0	0	0	0	0	0	0	0	1	0	0	0	0	0	1		punish 1:3
211208_0928	Leipzig	9	Dictator	5	5	5	2	Gain	25	2021733	2021	50	männlich	Deutschland	1	Ja	etwa im Durchschnitt	Ja	Online	0	0	0		3	0	0	0	0	0	1	0	0	0	0	0	0	0	0	0	0	1	0	0	0	0	0	1	0	punish 1:3
211201_0938	Magdeburg	1	Dictator	-5	-5	-5	2	Loss	22	2021822	2021	50	weiblich	Deutschland	1	Ja	ueber dem Durchschnitt	Nein	Online	0	0			3	0	0	0	0	0	1	0	0	0	0	0	0	0	0	0	0	1	0	0	0	0	0	1	0	punish 1:3
211124_0933	Magdeburg	6	Punisher	9	1	10	8	Gain	24	2021653	2021		männlich	Deutschland	1	Ja	ueber dem Durchschnitt	Ja	Online	0	0	0		3	0	0	0	0	1	1	1	1	1	0	0	0	0	0	0	1	1	1	0	0	0	0	1	0	punish 1:3
211130_1437	Magdeburg	5	Dictator	-2	-8	-2	1	Loss	21	2021898	2021	80	weiblich	Deutschland	1	Ja	unter dem Durchschnitt	Nein	Online	0	0			3	0	0	0	0	0	1	0	0	0	0	0	0	0	0	0	1	1	1	0	0	0	0	1	0	punish 1:3
221111_1242	Leipzig	11	Dictator	0	-10	0	2	Loss	20	2022028	2022	100	männlich	Deutschland	1	Ja	etwa im Durchschnitt	Ja	Online	0	0			3	0	0	0	0	0	1	0	0	0	0	0	0	0	0	0	0	1	0	0	0	0	0	1	0	punish 1:3
210908_0949	Leipzig	5	Punisher	-5	-5	0	1	Loss	30	2021509	2021		weiblich	Deutschland	1		ueber dem Durchschnitt	Ja	Online	0	0	0	0	3	0	0	0	0	0	1	0	0	0	0	0	0	0	0	0	0	1	0	0	0	0	0	1		punish 1:3
221111_1242	Leipzig	7	Punisher	-5	-5	0	5	Loss	26	2022008	2022		männlich	Deutschland	1	Ja	weit unter dem Durchschnitt	Nein	Online	0	0	0		3	0	0	0	0	0	1	0	0	0	0	0	0	0	0	0	0	1	0	0	0	0	0	1	0	punish 1:3
211208_0928	Leipzig	14	Dictator	4.5	5.5	4.5	8	Gain	25	2021738	2021	45	männlich	Deutschland	1	Ja	etwa im Durchschnitt	Ja	Online	0	0	0		3	0	0	0	0	0	0	1	0	0	0	0	0	0	0	0	0	1	0	0	0	0	0	1	0	punish 1:3
211208_0928	Leipzig	1	Dictator	5	5	5	9	Gain	26	2021725	2021	50	weiblich	Deutschland	1	Nein	etwa im Durchschnitt	Ja	Online	0	0	0		3	0	0	0	0	1	1	1	0	0	0	0	0	0	0	0	1	1	1	0	0	0	0	1	1	punish 1:3
221111_1242	Leipzig	20	Dictator	-5	-5	-5	4	Loss	21	2022027	2022	50	weiblich	Deutschland	1	Ja	etwa im Durchschnitt	Nein	Online	0	0			3	0	0	0	0	0	1	0	0	0	0	0	0	0	0	0	0	1	0	0	0	0	0	1	0	punish 1:3
211203_1236	Leipzig	6	Punisher	0	-10	-2	3	Loss	27	2021881	2021		männlich	Deutschland	1	Ja	etwa im Durchschnitt	Nein	Online	0	1	1		3	0	0	0	0	0	1	0	0	0	0	0	0	0	0	0	0	1	0	0	0	0	0	1	0	punish 1:3
211124_0933	Magdeburg	12	Punisher	7	3	10	7	Gain	26	2021659	2021		männlich	Andere	0	Ja	unter dem Durchschnitt	Ja	Online	0	0	0		3	0	0	0	0	1	0	0	0	0	0	0	0	0	0	0	0	1	0	0	0	0	0	1	0	punish 1:3
210908_0949	Leipzig	6	Dictator	-5		-5	4	Loss	24	2021527	2021	50	weiblich	Deutschland	1	Ja	ueber dem Durchschnitt	Nein	Online	0	0		5	3	0	0	0	0	0	1	0	0	0	0	0	0	0	0	0	1	1	1	0	0	0	0	1		punish 1:3
211203_0934	Leipzig	8	Dictator	-4	-6	-10	5	Loss	36	2021918	2021	60	weiblich	Deutschland	1		weit unter dem Durchschnitt	Ja	Online	0	1			3	0	0	0	0	1	1	1	0	0	0	0	0	0	0	0	0	1	0	0	0	0	0	1	0	punish 1:3
210908_1650	Leipzig	15	Dictator	-5		-5	4	Loss		2021505	2021	50	weiblich	Deutschland	1		etwa im Durchschnitt		Online	0	0		5	3	0	0	0	0	0	1	0	0	0	0	0	0	0	0	0	0	1	0	0	0	0	0	1		punish 1:3
[truncated: 2 more columns]
